# Supplementary material
Source: PubMed Central journal article supplement (PMC4046259)
Supplement: NIHMS588986-supplement-Supplementary_Data.pdf [file NIHMS588986-supplement-Supplementary_Data.pdf]

## Supplementary Data

### Comparative Analysis of Nuclear tRNA Genes of *Nasonia vitripennis* with *Apis mellifera* and Other Sequenced Arthropods

Susanta K. Behura<sup>1\*</sup>, Mario Stanke<sup>2</sup>, Christopher A. Desjardins<sup>3</sup>, John H. Werren<sup>3</sup>, David W. Severson<sup>1</sup>

<sup>1</sup>Eck Institute for Global Health  
Department of Biological Sciences  
University of Notre Dame  
Notre Dame, IN 46556  
USA

<sup>2</sup>Institute of Microbiology and Genetics  
Department of Bioinformatics  
University of Göttingen, 37077 Göttingen  
Germany

<sup>3</sup>Department of Biology,  
University of Rochester,  
Rochester, New York 14627  
USA

\*Correspondence:

Susanta K. Behura  
E-mail: sbehura@nd.edu  
Phone: 574-631-4151; Fax: 574-631-7413

Supplementary Table 1a. List of Nasonia tRNA genes.

| Gene ID       | Position Scaffold                  | sequence                                                                       |
|---------------|------------------------------------|--------------------------------------------------------------------------------|
| Ala( agc) -1  | 11:8988<br>42-898914<br>Scaffold   | gggggcgtagctcagatggtagagcgctcgcttagcatgcgagaggtaccgggatcgataaccggcgcc<br>tcca  |
| Ala( agc) -2  | 37:6475<br>44-647472<br>Scaffold   | gggggcgtagctcagatggtagagcgctcgcttagcatgcgagaggtaccgggatcgataaccggcgcc<br>tcca  |
| Ala( agc) -3  | 12:3038<br>187-3038262<br>Scaffold | taggggcgtagctcagatggtagagcgctcgcttagcatgcgagaggtaccgggatcgataaccggcg<br>cctcaa |
| Ala( agc) -4  | 11:8974<br>47-897519<br>Scaffold   | gggggcgtagctcagatggtagagcgctcgcttagcatgtgagaggtaccgggatcgataaccggcgcc<br>tcca  |
| Ala( agc) -5  | 11:9106<br>64-910592<br>Scaffold   | gggggcgtagctcagatggtagagcgctcgcttagcatgtgagaggtaccgggatcgataaccggcgcc<br>tcca  |
| Ala( agc) -6  | 11:9083<br>44-908272<br>Scaffold   | gggggcgtagctcagatggtagagcgctcgcttagcatgcgagaggtaccgggatcgataaccggcgcc<br>tcca  |
| Ala( agc) -7  | 11:9111<br>00-911172<br>Scaffold   | gggggcgtagctcagatggtagagcgctcgcttagcatgcgagaggtaccgggatcgataaccggcgcc<br>tcca  |
| Ala( agc) -8  | 11:9197<br>60-919832<br>Scaffold   | gggggcgtagctcagatggtagagcgctcgcttagcatgcgagaggtaccgggatcgataaccggcgcc<br>tcca  |
| Ala( agc) -9  | 12:3037<br>408-3037480<br>Scaffold | gggggcgtagctcagatggtagagcgctcgcttagcatgcgagaggtaccgggatcgataaccggcgcc<br>tcca  |
| Ala( agc) -10 | 12:3045<br>987-3046059<br>Scaffold | gggggcgtagctcagatggtagagcgctcgcttagcatgcgagaggtaccgggatcgataaccggcgcc<br>tcca  |
| Ala( agc) -11 | 12:3046<br>797-3046869<br>Scaffold | gggggcgtagctcagatggtagagcgctcgcttagcatgcgagaggtaccgggatcgataaccggcgcc<br>tcca  |
| Ala( agc) -12 | 3:18982<br>97-1898369<br>Scaffold  | gggggcgtagctcagatggtagagcgctcgcttagcatgcgagaggtaccgggatcgataaccggcgcc<br>tcca  |
| Ala( agc)     | 37:6224<br>Scaffold                | gggggcgtagctcagatggtagagcgctcgcttagcatgcgagaggtaccgggatcgataaccggcgcc<br>tcca  |

|                    |                                        |                                                                                     |
|--------------------|----------------------------------------|-------------------------------------------------------------------------------------|
| -13                | 36-<br>622364<br>Scaffold              |                                                                                     |
| Ala(t<br>gc)-<br>1 | 2:25953<br>34-<br>2595405<br>Scaffold  | ggggatgtagctcagtggttagagcggttcgctttgcatgtgaaagggtcccgggttcgatccccggcatctcca         |
| Ala(t<br>gc)-<br>2 | 7:38095<br>92-<br>3809521<br>Scaffold  | ggggatgtagctcagtggttagagcggttcgctttgcatgtgaaagggtcccgggttcgatccccggcatctcca         |
| Ala(t<br>gc)-<br>3 | 7:38100<br>39-<br>3810110<br>Scaffold  | ggggatgtagctcagtggttagagcggttcgctttgcatgtgaaagggtcccgggttcgatccccggcatctcca         |
| Arg(<br>acg)<br>-1 | 127:662<br>28-<br>66302<br>Scaffold    | cggtcctgtggcgcaacggataacgcgtctgactacggatcagaagattccaggttcgaatcctggcagg<br>atcga     |
| Arg(<br>acg)<br>-2 | 46:2906<br>34-<br>290708<br>Scaffold   | cggtcctgtggcgcaacggataacgcgtctgactacggatcagaagattccaggttcgaatcctggcagg<br>atcga     |
| Arg(<br>acg)<br>-3 | 37:8738<br>78-<br>873950<br>Scaffold   | ggtcctgtggcgcaacggataacgcgtctgactacggatcagaagattccaggttcgaatcctggcagga<br>tcg       |
| Arg(<br>acg)<br>-4 | 9:89213-<br>89141<br>Scaffold          | ggtcctgtggcgcaacggataacgcgtctgactacggatcagaagattccaggttcgaatcctggcagga<br>tcg       |
| Arg(<br>cct)-<br>1 | 1:13299<br>43-<br>1329870<br>Scaffold  | gcccctgtggcctaataaggataaggcatcgggtctcctaaaccggggattgtgggttcgagtcccaccagggg<br>tac   |
| Arg(<br>cct)-<br>2 | 1:13372<br>57-<br>1337184<br>Scaffold  | gcccctgtggcctaataaggataaggcatcgggtctcctaaaccggggattgtgggttcgagtcccaccagggg<br>tac   |
| Arg(<br>cct)-<br>3 | 10:7017<br>06-<br>701779<br>Scaffold   | gcccctgtggcctaataaggataaggcatcgggtctcctaaaccggggattgtgggttcgagtcccaccagggg<br>tac   |
| Arg(<br>tcg)-<br>1 | 19:1078<br>507-<br>1078430<br>Scaffold | tgaccgtgtggcctaataaggataaggcgtcggactcggatccgaagattgcaggttcgagtcctgtcacggt<br>cgacca |
| Arg(<br>tcg)-<br>2 | 5:39705<br>35-<br>3970612<br>Scaffold  | tgaccgtgtggcctaataaggataaggcgtcggactcggatccgaagattgcaggttcgagtcctgtcacggt<br>cgacca |
| Arg(<br>tcg)-<br>3 | 13:2927<br>680-<br>2927606<br>Scaffold | cgaccgtgtggcctaacggataaggcgtcggactcggatccgaagattgcaggttcgagtcctgtcacgg<br>tcga      |
| Asn(<br>gtt)-<br>1 | 3:43229-<br>43156<br>Scaffold          | gcctccgtggcgcaatcggctagcgcgttcggctgtaaccgaaagggttggtgggttcgagcccacccggg<br>ggcg     |

|       |             |                                                                         |
|-------|-------------|-------------------------------------------------------------------------|
| Asn(  | Scaffold    |                                                                         |
| gtt)- | 5:25642     |                                                                         |
| 2     | 91-2564366  | tgctccgtggcgcaattggctagcgcgttcggctgtaaccgaaaggttggtggtcgagcccaccggg     |
|       | Scaffold    | ggcgt                                                                   |
| Asn(  | 144:293     |                                                                         |
| gtt)- | 123-293050  | gcctccgtggcgcaattggctagcgcgttcggctgtaaccgaaaggttggtggtcgagcccaccggg     |
| 3     | Scaffold    | gcg                                                                     |
| Asn(  | 22:2377     |                                                                         |
| gtt)- | 140-2377213 | gcctccgtggcgcaattggctagcgcgttcggctgtaaccgaaaggttggtggtcgagcccaccggg     |
| 4     | Scaffold    | gcg                                                                     |
| Asn(  | 22:2294     |                                                                         |
| gtt)- | 074-2294146 | gcctccgtggcgcaattggctagcgcgttcggctgtaaccgaaaggttggtggtcgagcccaccggg     |
| 5     | Scaffold    | gcg                                                                     |
| Asn(  | 9:18387     |                                                                         |
| gtt)- | 48-1838676  | gcctccgtggcgcaattggctagcgcgttcggctgtaaccgaaaggttggtggtcgagcccaccggg     |
| 6     | Scaffold    | gcg                                                                     |
| Asn(  | 24:2144     |                                                                         |
| gtt)- | 156-2144081 | cgctccgtggcgcaattggctagcgcgttcggctgtaaccgaaaggttggtggtcgagcccaccggg     |
| 7     | Scaffold    | agcgg                                                                   |
| Asn(  | 24:2174     |                                                                         |
| gtt)- | 811-2174737 | cgctccgtggcgcaattggctagcgcgttcggctgtaaccgaaaggttggtggtcgagcccaccggg     |
| 8     | Scaffold    | agcgg                                                                   |
| Asp(  | 18:1651     |                                                                         |
| gtc)- | 550-1651479 | tctcagtagtatagtggtcagtagtccccgcctgtcacgcgggagaccggggtcgattccccgctggagag |
| 1     | Scaffold    |                                                                         |
| Asp(  | 38:1707     |                                                                         |
| gtc)- | 122-1707051 | tctcagtagtatagtggtcagtagtccccgcctgtcacgcgggagaccggggtcgattccccgcccgggga |
| 2     | Scaffold    | g                                                                       |
| Asp(  | 21:2767     |                                                                         |
| gtc)- | 278-2767349 | tctcagtagtatagtggtcagtagtccccgcctgtcacgcgggagaccggggtcgattccccgctggagag |
| 3     | Scaffold    |                                                                         |
| Asp(  | 3:69737     |                                                                         |
| gtc)- | 5-697304    | tctcagtagtatagtggtcagtagtccccgcctgtcacgcgggagaccggggtcgattccccgctggagag |
| 4     | Scaffold    |                                                                         |
| Asp(  | 62:8629     |                                                                         |
| gtc)- | 33-863004   | tctcagtagtatagtggtcagtagtccccgcctgtcacgcgggagaccggggtcgattccccgctggagag |
| 5     | Scaffold    |                                                                         |
| Asp(  | 62:8631     |                                                                         |
| gtc)- | 86-863257   | tctcagtagtatagtggtcagtagtccccgcctgtcacgcgggagaccggggtcgattccccgctggagag |
| 6     | Scaffold    |                                                                         |
| Asp(  | 62:8633     |                                                                         |
| gtc)- | 29-863400   | tctcagtagtatagtggtcagtagtccccgcctgtcacgcgggagaccggggtcgattccccgctggagag |
| 7     |             |                                                                         |

|       |          |                                                                            |
|-------|----------|----------------------------------------------------------------------------|
|       | Scaffold |                                                                            |
| Asp(  | 62:8723  |                                                                            |
| gtc)- | 62-      |                                                                            |
| 8     | 872433   | tcttcagtagtatagtggtcagtagatccccgcctgtcacgcgggagaccggggttcgattccccgctggagag |
|       | Scaffold |                                                                            |
| Asp(  | 19:1489  |                                                                            |
| gtc)- | 401-     | tcttcggtagtagtggtcagtagatccccgcctgtcacgcgggagaccggggttcgattccccgccgggga    |
| 9     | 1489472  | g                                                                          |
|       | Scaffold |                                                                            |
| Asp(  | 36:1190  |                                                                            |
| gtc)- | 204-     | tcttcggtagtagtggtcagtagatccccgcctgtcacgcgggagaccggggttcgattccccgccgggga    |
| 10    | 1190133  | g                                                                          |
|       | Scaffold |                                                                            |
| Cys(  | 1:27863  |                                                                            |
| gca)  | 39-      | ggggtagtagctcagtggttagagcattcgactgcagatcgagagggtccccgggtcaaaccgggtgcccc    |
| -1    | 2786411  | ctc                                                                        |
|       | Scaffold |                                                                            |
| Cys(  | 3:19028  |                                                                            |
| gca)  | 04-      | ggggtagtagctcagtggttagagcattcgactgcagatcgagagggtccccgggtcaaaccgggtgcccc    |
| -2    | 1902876  | ctc                                                                        |
|       | Scaffold |                                                                            |
| Cys(  | 34:8198  |                                                                            |
| gca)  | 27-      | ggggtagtagctcagtggttagagcattcgactgcagatcgagagggtccccgggtcaaaccgggtgcccc    |
| -3    | 819755   | ctc                                                                        |
|       | Scaffold |                                                                            |
| Cys(  | 5:27661  |                                                                            |
| gca)  | 46-      | ggggtagtagctcagtggttagagcattcgactgcagatcgagagggtccccgggtcaaaccgggtgcccc    |
| -4    | 2766074  | ctc                                                                        |
|       | Scaffold |                                                                            |
| Cys(  | 3:19026  |                                                                            |
| gca)  | 11-      | ggggatagtagctcagtggttagagcattcgactgcagatcgagagggtccccgggtcaaaccgggtgtccc   |
| -5    | 1902683  | ctc                                                                        |
|       | Scaffold |                                                                            |
| Gln(  | 13:2404  |                                                                            |
| ctg)- | 926-     |                                                                            |
| 1     | 2404997  | ggtccatggtgtaatggttagcactctggactctgaatccagcgatccgaggtcaaactctcggtggaacct   |
|       | Scaffold |                                                                            |
| Gln(  | 36:1112  |                                                                            |
| ctg)- | 943-     | aggtctcatggtgtaatggtcagcactctggactctgaatccagcgatccgaggtcaaactctcggtgagacct |
| 2     | 1113017  | tc                                                                         |
|       | Scaffold |                                                                            |
| Gln(  | 127:326  |                                                                            |
| ctg)- | 382-     |                                                                            |
| 3     | 326311   | ggtccatggtgtaatggttagcactctggactctgaatccagcgatccgaggtcaaactctcggtgggacct   |
|       | Scaffold |                                                                            |
| Gln(  | 14:2548  |                                                                            |
| ctg)- | 581-     |                                                                            |
| 4     | 2548652  | ggtccatggtgtaatggttagcactctggactctgaatccagcgatccgaggtcaaactctcggtgggacct   |
|       | Scaffold |                                                                            |
| Gln(  | 7:38110  |                                                                            |
| ctg)- | 76-      | aggtccatggtgtaatggtcagcactctggactctgaatccagcgatccgaggtcaaactctcggtgggacc   |
| 5     | 3811151  | ttcc                                                                       |
|       | Scaffold |                                                                            |
| Gln(  | 1:64695  |                                                                            |
| ttg)- | 78-      |                                                                            |
| 1     | 6469649  | ggtccatggtgtaatggttagcactctggactttgaatccagcgatccgaggtcaaactctcggtgggacct   |

|       |          |                                                                           |
|-------|----------|---------------------------------------------------------------------------|
|       | Scaffold |                                                                           |
| Gln(  | 127:320  |                                                                           |
| ttg)- | 220-     |                                                                           |
| 2     | 320291   | ggtcccatgggtgaatggtagcactctggactttgaatccagcgatccgagttcaaattcgggtgggacct   |
|       | Scaffold |                                                                           |
| Gln(  | 7:33956  |                                                                           |
| ttg)- | 53-      |                                                                           |
| 3     | 3395724  | ggtcccatgggtgaatggtagcactctggactttgaatccagcgatccgagttcaaattcgggtgggacct   |
|       | Scaffold |                                                                           |
| Gln(  | 16:3361  |                                                                           |
| ttg)- | 927-     |                                                                           |
| 4     | 3361998  | ggttctgtgggtgaatggtaagcactctggactttgaatccagcgatccgagttcaaattcggcagaacct   |
|       | Scaffold |                                                                           |
| Glu(  | 13:1294  |                                                                           |
| ctc)- | 176-     |                                                                           |
| 1     | 1294105  | tccggtatgggtctagtggttaggatacctggctctcaccaggaggctcgggttcgattcccggtagccggaa |
|       | Scaffold |                                                                           |
| Glu(  | 2:61620  |                                                                           |
| ctc)- | 9-       |                                                                           |
| 2     | 616280   | tccggtatgggtctagtggttaggatacctggctctcaccaggaggctcgggttcgattcccggtagccggaa |
|       | Scaffold |                                                                           |
| Glu(  | 22:1659  |                                                                           |
| ctc)- | 337-     |                                                                           |
| 3     | 1659408  | tccggtatgggtctagtggttaggatacctggctctcaccaggaggctcgggttcgattcccggtagccggaa |
|       | Scaffold |                                                                           |
| Glu(  | 8:26461  |                                                                           |
| ctc)- | 54-      |                                                                           |
| 4     | 2646225  | tccggtatgggtctagtggttaggatacctggctctcaccaggaggctcgggttcgattcccggtagccggaa |
|       | Scaffold |                                                                           |
| Glu(  | 8:32744  |                                                                           |
| ctc)- | 86-      |                                                                           |
| 5     | 3274415  | tccggtatgggtctagtggttaggatacctggctctcaccaggaggctcgggttcgattcccggtagccggaa |
|       | Scaffold |                                                                           |
| Glu(  | 37:1046  |                                                                           |
| ctc)- | 029-     |                                                                           |
| 6     | 1045958  | tccgatatgggtctagtggttaggatacctggctctcaccaggaggctcgggttcgattcccggtagccggaa |
|       | Scaffold |                                                                           |
| Glu(  | 8:32715  |                                                                           |
| ctc)- | 12-      |                                                                           |
| 7     | 3271583  | tccgatatgggtctagtggttaggatacctggctctcaccaggaggctcgggttcgattcccggtagccggaa |
|       | Scaffold |                                                                           |
| Glu(  | 1:58347  |                                                                           |
| ttc)- | 20-      |                                                                           |
| 1     | 5834649  | tcccatatgggtctagtggttaggatacctggcttccaccaggaggctcgggttcgattcccggtagccggaa |
|       | Scaffold |                                                                           |
| Glu(  | 7:10819  |                                                                           |
| ttc)- | 22-      |                                                                           |
| 2     | 1081993  | tcccatatgggtctagtggttaggatacctggcttccaccaggaggctcgggttcgattcccggtagccggaa |
|       | Scaffold |                                                                           |
| Glu(  | 2:68542  |                                                                           |
| ttc)- | 18-      |                                                                           |
| 3     | 6854147  | tcccgtatgggtctagtggttaggatacctggcttccaccaggaggctcgggttcgattcccggtagccggaa |
|       | Scaffold |                                                                           |
| Glu(  | 37:8679  |                                                                           |
| ttc)- | 80-      |                                                                           |
| 4     | 868051   | tcccgtatgggtctagtggttaggatacctggcttccaccaggaggctcgggttcgattcccggtagccggaa |

|       |          |                                                                          |
|-------|----------|--------------------------------------------------------------------------|
|       | Scaffold |                                                                          |
| Glu(  | 37:8701  |                                                                          |
| ttc)- | 39-      |                                                                          |
| 5     | 870068   | tcccgtatggtctagtggttaggatacctggctttcaccaggaggctcgggttcgattcccgggtacgggaa |
|       | Scaffold |                                                                          |
| Glu(  | 37:8793  |                                                                          |
| ttc)- | 34-      |                                                                          |
| 6     | 879263   | tcccgtatggtctagtggttaggatacctggctttcaccaggaggctcgggttcgattcccgggtacgggaa |
|       | Scaffold |                                                                          |
| Glu(  | 8:32738  |                                                                          |
| ttc)- | 77-      |                                                                          |
| 7     | 3273948  | tccggtatggtctagtggttaggatacctggctttcaccaggaggctcgggttcgattcccgggtaccggaa |
|       | Scaffold |                                                                          |
| Gly(  | 21:2766  |                                                                          |
| gcc)  | 610-     | gcatcgggtggtcagtggttagaatgctcgctgccacgcgggcccgggttcgattcccggccgatgc      |
| -1    | 2766680  | a                                                                        |
|       | Scaffold |                                                                          |
| Gly(  | 36:1189  |                                                                          |
| gcc)  | 016-     | aaggttcgattcccggcagtggttagaatgctcgctgccacgcgggcccgggttcgattcccggcatt     |
| -2    | 1188943  | ctg                                                                      |
|       | Scaffold |                                                                          |
| Gly(  | 2:19762  |                                                                          |
| gcc)  | 16-      |                                                                          |
| -3    | 1976147  | gcatcgggtggtcagtggttagaatgctcgctgccacgcgggcccgggttcgatcccggccgatgca      |
|       | Scaffold |                                                                          |
| Gly(  | 33:1448  |                                                                          |
| gcc)  | 383-     | gcatcgggtggtcagtggttagaatgctcgctgccacgcgggcccgggttcgattcccggccgatgc      |
| -4    | 1448313  | a                                                                        |
|       | Scaffold |                                                                          |
| Gly(  | 36:1181  |                                                                          |
| gcc)  | 244-     | gcatcgggtggtcagtggttagaatgctcgctgccacgcgggcccgggttcgattcccggccgatgc      |
| -5    | 1181314  | a                                                                        |
|       | Scaffold |                                                                          |
| Gly(  | 36:1181  |                                                                          |
| gcc)  | 887-     | gcatcgggtggtcagtggttagaatgctcgctgccacgcgggcccgggttcgattcccggccgatgc      |
| -6    | 1181817  | a                                                                        |
|       | Scaffold |                                                                          |
| Gly(  | 58:3687  |                                                                          |
| gcc)  | 09-      | gcatcgggtggtcagtggttagaatgctcgctgccacgcgggcccgggttcgattcccggccgatgc      |
| -7    | 368779   | a                                                                        |
|       | Scaffold |                                                                          |
| Gly(  | 62:8589  |                                                                          |
| gcc)  | 22-      | gcatcgggtggtcagtggttagaatgctcgctgccacgcgggcccgggttcgattcccggccgatgc      |
| -8    | 858992   | a                                                                        |
|       | Scaffold |                                                                          |
| Gly(  | 8:19035- |                                                                          |
| gcc)  | 19105    | gcatcgggtggtcagtggttagaatgctcgctgccacgcgggcccgggttcgattcccggccgatgc      |
| -9    | 19105    | a                                                                        |
|       | Scaffold |                                                                          |
| Gly(  | 87:3436  |                                                                          |
| gcc)  | 58-      | gcatcgggtggtcagtggttagaatgctcgctgccacgcgggcccgggttcgattcccggccgatgc      |
| -10   | 343728   | a                                                                        |
|       | Scaffold |                                                                          |
| Gly(  | 14:2280  |                                                                          |
| gcc)  | 387-     | gcatcagtggtcagtggttagaatgctcgctgccacgcgaacggcccagttcgattcccggctgatgc     |
| -11   | 2280457  | a                                                                        |
| Gly(t | Scaffold | gcgatggtggtgtaatggtcagcatagttgcctccaagcagttgatccgggttcgattcccggccatcgcac |

|       |          |                                                                           |
|-------|----------|---------------------------------------------------------------------------|
| cc)-  | 1516:80  |                                                                           |
| 1     | 71-7999  |                                                                           |
|       | Scaffold |                                                                           |
| Gly(t | 18:2382  |                                                                           |
| cc)-  | 622-     |                                                                           |
| 2     | 2382678  | gcgatggtggtgtaatggtcagcatagttgcctccaagcagttgatccgggttcgattcccggccatcgcac  |
|       | Scaffold |                                                                           |
| Gly(t | 2:60589  |                                                                           |
| cc)-  | 9-       |                                                                           |
| 3     | 605971   | gcgatggtggtgtaatggtcagcatagttgcctccaagcagttgatccgggttcgattcccggccatcgcac  |
|       | Scaffold |                                                                           |
| Gly(t | 389:653  |                                                                           |
| cc)-  | 46-      |                                                                           |
| 4     | 65274    | gcgatggtggtgtaatggtcagcatagttgcctccaagcagttgatccgggttcgattcccggccatcgcac  |
|       | Scaffold |                                                                           |
| Gly(t | 4:28133  |                                                                           |
| cc)-  | 96-      |                                                                           |
| 5     | 2813468  | gcgatggtggtgtaatggtcagcatagttgcctccaagcagttgatccgggttcgattcccggccatcgcac  |
|       | Scaffold |                                                                           |
| Gly(t | 1516:10  |                                                                           |
| cc)-  | 250-     |                                                                           |
| 6     | 10178    | gcgatggtggtgtaatggtcagcatagttgcctccaagcagttgatccgggttcgattcccggctatcgcac  |
|       | Scaffold |                                                                           |
| His(  | 16:2920  |                                                                           |
| gtg)- | 720-     |                                                                           |
| 1     | 2920649  | gccgtgatcgctagtggttaggaccctacgttgtggccgtagtaaccaggttcgaatcctggtcacggca    |
|       | Scaffold |                                                                           |
| His(  | 16:2920  |                                                                           |
| gtg)- | 918-     |                                                                           |
| 2     | 2920847  | gccgtgatcgctagtggttaggaccctacgttgtggccgtagtaaccaggttcgaatcctggtcacggca    |
|       | Scaffold |                                                                           |
| His(  | 40:1523  |                                                                           |
| gtg)- | 332-     |                                                                           |
| 3     | 1523261  | gccgtgatcgctagtggttaggaccctacgttgtggccgtagtaaccaggttcgaatcctggtcacggca    |
|       | Scaffold |                                                                           |
| His(  | 8:36360  |                                                                           |
| gtg)- | 7-       |                                                                           |
| 4     | 363536   | gccgtgatcgctagtggttaggaccctacgttgtggccgtagtaaccaggttcgaatcctggtcacggca    |
|       | Scaffold |                                                                           |
| His(  | 9:33831  |                                                                           |
| gtg)- | 7-       |                                                                           |
| 5     | 338388   | gccgtgatcgctagtggttaggaccctacgttgtggccgtagtaaccaggttcgaatcctggtcacggca    |
|       | Scaffold |                                                                           |
| His(  | 9:33896  |                                                                           |
| gtg)- | 0-       |                                                                           |
| 6     | 339031   | gccgtgatcgctagtggttaggaccctacgttgtggccgtagtaaccaggttcgaatcctggtcacggca    |
|       | Scaffold |                                                                           |
| His(  | 9:34261  |                                                                           |
| gtg)- | 5-       |                                                                           |
| 7     | 342686   | gccgtgatcgctagtggttaggaccctacgttgtggccgtagtaaccaggttcgaatcctggtcacggca    |
|       | Scaffold |                                                                           |
| His(  | 9:34393  |                                                                           |
| gtg)- | 8-       |                                                                           |
| 8     | 344009   | gccgtgatcgctagtggttaggaccctacgttgtggccgtagtaaccaggttcgaatcctggtcacggca    |
| Ile(a | Scaffold | ggccattagctcagttggttagagcgctcgctgctaataacgcgaagggtcgcggttcgattcccctatgggc |
| at)-1 | 14:1817  | cac                                                                       |



766-  
 1817692  
 Scaffold  
 14:1817  
 Ile(a 929- ggcccattagctcagttggttagagcgctgctgtaataacgcgaaggctcgcggttcgatcccctcatgggc  
 at)-2 1817855 cac  
 Scaffold  
 2:18575  
 Ile(a 49- ggcccattagctcagttggttagagcgctgctgtaataacgcgaaggctcgcggttcgatcccctcatgggc  
 at)-3 1857475 cac  
 Scaffold  
 20:5897  
 Ile(a 89- ggcccattagctcagttggttagagcgctgctgtaataacgcgaaggctcgcggttcgatcccctcatgggc  
 at)-4 589715 cac  
 Scaffold  
 40:4673  
 Ile(a 29- ggcccattagctcagttggttagagcgctgctgtaataacgcgaaggctcgcggttcgatcccctcatgggc  
 at)-5 467255 cac  
 Scaffold  
 9:95529- ggcccattagctcagttggttagagcgctgctgtaataacgcgaaggctcgcggttcgatcccctcatgggc  
 at)-6 95455 cac  
 Scaffold  
 4:48778  
 Ile(a 25- tggcttcatagctcagctgggttagagcgctgctgtaataacgcgaaggctcgcggttcgatcccctcctgg  
 at)-7 4877748 agccaa  
 Scaffold  
 12:1821  
 Ile(a 589- ggcttgtagctcagctgggttagagcgctgctgtaataacgcgaaggctcggttcgatcccctcagagc  
 at)-8 1821662 ca  
 Scaffold  
 40:4680  
 Ile(a 70- ggcccattagctcagttggttagagcgctgctgtaataacgcgaaggccgcggttcgatcccccatggg  
 at)-9 468143 cca  
 Scaffold  
 Ile.I. 62:6857 GCTCCAGTGGCGCAATTGGTtAGCGCACGGTACTTATAagacagtgttcgtgag  
 TAT -1 9-68670 caATGCCGGGGtTGTGAGTTCGAGCCTCACCTGGAGCA  
 Scaffold  
 Ile.I. 139:293  
 TAT 760- GCTCCAGTGGCGCAATTGGTtAGCGCACGGTACTTATAagacagtgttacgtga  
 -2 293852 gcaATGCCGGGGtTGTGAGTTCGAGCCTCACCTGGAGCA  
 Scaffold  
 Ile.I. 62:6986 GCTCCAGTGGCGCAATTGGTtAGCGCACGGTACTTATAagacagtgttacgtga  
 TAT -3 0-69952 gcaATGCCGGGGtTGTGAGTTCGAGCCTCACCTGGAGCA  
 Scaffold  
 Leu( 14:3525  
 aag) 477- ggtagcgtggccgagcggctctaaaggcgtggttaaggcaccagtctctcggaggcgtgggttcgaatcc  
 -1 3525558 caccgctgcca  
 Scaffold  
 Leu( 2:25915  
 aag) 64- ggtagcgtggccgagcggctctaaaggcgtggttaaggcaccagtctctcggaggcgtgggttcgaatcc  
 -2 2591645 caccgctgcca  
 Scaffold  
 Leu( 7:31829  
 aag) 29- ggtagcgtggccgagcggctctaaaggcgtggttaaggcaccagtctctcggaggcgtgggttcgaatcc  
 -3 3182848 caccgctgcca  
 Scaffold  
 Leu( tgtagcgtggccgagcggctctaaaggcgtggttaaggcaccagtctctcggaggcgtgggttcgaatc

|       |          |                                                                             |
|-------|----------|-----------------------------------------------------------------------------|
| aag)  | 3:22744- | ccaccgctgcaa                                                                |
| -4    | 22827    |                                                                             |
|       | Scaffold |                                                                             |
| Leu(  | 31:3520  |                                                                             |
| aag)  | 63-      | tggtagcgtggccgagcgggtctaaggcgctggtttaaggcaccagtctctcggaggcgtgggttcgaatc     |
| -5    | 352146   | ccaccgctgcaa                                                                |
|       | Scaffold |                                                                             |
| Leu(  | 9:40730  |                                                                             |
| aag)  | 7-       | tggtagcgtggccgagcgggtctaaggcgctggtttaaggcaccagtctctcggaggcgtgggttcgaatc     |
| -6    | 407390   | ccaccgctgcaa                                                                |
|       | Scaffold |                                                                             |
| Leu(  | 2:21796  |                                                                             |
| cag)  | 28-      | gtcaggatggccgagcgggtctaaggcgctgcgttcaggctgcagtcaccacttctgtgggcgtgggttcgaatc |
| -1    | 2179545  | ccacttctgaca                                                                |
|       | Scaffold |                                                                             |
| Leu(  | 5:58639  |                                                                             |
| cag)  | 7-       | gtcaggatggccgagcgggtctaaggcgctgcgttcaggctgcagtcaccacttctgtgggcgtgggttcgaatc |
| -2    | 586480   | ccacttctgaca                                                                |
|       | Scaffold |                                                                             |
| Leu(  | 3:13795  |                                                                             |
| cag)  | 42-      | gtcaggatggccgagtggtctaaggcgctgcgttcaggctgcagtcaccacttctgtgggcgtgggttcgaatc  |
| -3    | 1379459  | ccacttctgaca                                                                |
|       | Scaffold |                                                                             |
| Leu(  | 7:55052  |                                                                             |
| cag)  | 6-       | gtcaggatggccgagtggtctaaggcgctgcgttcaggctgcagtcaccacttctgtgggcgtgggttcgaatc  |
| -4    | 550443   | ccacttctgaca                                                                |
|       | Scaffold |                                                                             |
| Leu(  | 1:49548  |                                                                             |
| taa)- | 55-      | gccaggttgcccgagcgggtctaaggcgcggttaagctcctgttccctctgggagcgtgggttcgaatc       |
| 1     | 4954938  | ccacacctggca                                                                |
|       | Scaffold |                                                                             |
| Leu(  | 7:38025  |                                                                             |
| taa)- | 19-      | gctaggttgccgagcgggtctaaggcgccagacttaagttctggttcccgtctgggagcgtgggttcgaacc    |
| 2     | 3802602  | ccacacttagca                                                                |
|       | Scaffold |                                                                             |
| Leu(  | 35:9244  |                                                                             |
| taa)- | 75-      | gctaggttgccgagcgggtctaaggcgccagatttaagctctggttcccgtctgggagcgtgggttcgaacc    |
| 3     | 924392   | ccacaccttagca                                                               |
|       | Scaffold |                                                                             |
| Leu(  | 16:9485  |                                                                             |
| tag)- | 3-94774  | ggcagcgtggccgagcgggtctaaggcgctggttttaggcaccagtccgaaagggcgtgggttcgaatccc     |
| 1     | 3-94774  | accgctgtca                                                                  |
|       | Scaffold |                                                                             |
| Leu(  | 7:38121  |                                                                             |
| tag)- | 91-      | ggcagcgtggccgagcgggtctaaggcgctggttttaggcaccagtccgaaagggcgtgggttcgaatccc     |
| 2     | 3812112  | accgctgtca                                                                  |
|       | Scaffold |                                                                             |
| Leu.  | 62:2305  | GTCAGGATGGCCGAGCGGTctAAGGCGCCAGACTCAAGgtattaccttctcggtc                     |
| I.CA  | 27-      | gaacaccgagtttctgggcaTTCTGGTCTCTCTGAGGGCGTGGGTTCGAATCCC                      |
| A-1   | 230408   | ACTTCTGACA                                                                  |
|       | Scaffold |                                                                             |
| Leu.  | 2:68563  | GTCAGGATGGCCGAGCGGTctAAGGCGCCAGACTCAAGgttcatttcttctcggtc                    |
| I.CA  | 57-      | taaacaccgagtttctgggcaTTCTGGTCTCTCTGAGGGCGTGGGTTCGAATCCC                     |
| A-2   | 6856237  | ACTTCTGACA                                                                  |
|       | Scaffold |                                                                             |
| Leu.  | 2:68552  | GTCAGGATGGCCGAGCGGTctAAGGCGCCAGACTCAAGgattatataataccttct                    |
| I.CA  | 2:68552  | cgattagacatcgagtttctgggcaTTCTGGTCTCTCTGAGGGCGTGGGTTCGAA                     |
| A-3   | 76-      | TCCCATTCTGACA                                                               |

6855150  
Scaffold

Lys( 1:10247  
ctt)- 66- gcccggctagctcagtcggtagagcatgagactcttaatctcagggctcgtgggttcgagccccacgttggg  
1 1024694 cgc  
Scaffold

Lys( 19:2744  
ctt)- 159- cgcccggctagctcagtcggtagagcatgagactcttaatctcagggctcgtgggttcgagccccacgttgg  
2 2744233 gcga  
Scaffold

Lys( 62:8790  
ctt)- 74- cgcccggctagctcagtcggtagagcatgagactcttaatctcagggctcgtgggttcgagccccacgttgg  
3 879147 gcga  
Scaffold

Lys( 16:1365  
ctt)- 380- gcctggctagctcagtcggtagagcatgagactcttaatctcagggctcgtgggttcgagccccacgttgggc  
4 1365452 g  
Scaffold

Lys( 1:39476  
ctt)- 67- tgcccggctagctcagtcggtagagcatgagactcttaatctcagggctcgtgggttcgagccccacgttggg  
5 3947740 cgt  
Scaffold

Lys( 62:8786  
ctt)- 25- tgcccggctagctcagtcggtagagcatgagactcttaatctcagggctcgtgggttcgagccccacgttggg  
6 878698 cgt  
Scaffold

Lys( 1:29223  
ctt)- 07- gcccggctagctcagtcggtagagcatgagactcttaatctcagggctcgtgggttcgagccccacgttggg  
7 2922234 cgc  
Scaffold

Lys( 1:29381  
ctt)- 37- gcccggctagctcagtcggtagagcatgagactcttaatctcagggctcgtgggttcgagccccacgttggg  
8 2938064 cgc  
Scaffold

Lys( 2:26760  
ctt)- 87- gcccggctagctcagtcggtagagcatgagactcttaatctcagggctcgtgggttcgagccccacgttggg  
9 2676014 cgc  
Scaffold

Lys( 2:27593  
ctt)- 80- gcccggctagctcagtcggtagagcatgagactcttaatctcagggctcgtgggttcgagccccacgttggg  
10 2759453 cgc  
Scaffold

Lys( 62:8761  
ctt)- 89- gcccggctagctcagtcggtagagcatgagactcttaatctcagggctcgtgggttcgagccccacgttggg  
11 876262 cgc  
Scaffold

Lys( 1:81853  
ttd)-1 26- cgcccggatagctcagtcggtagagcatcagacttttaatctgaggggtccaggggttcgagtcctgttcggg  
8185400 cgt  
Scaffold

Lys( 19:2702  
ttd)-2 606- gcccggatagctcagtcggtagagcatcagacttttaatctgaggggtccaggggtcaagtcctgttcgggc  
2702534 g  
Scaffold

Lys( 42:1668  
ttd)-3 843- gcccggatagctcagtcggtagagcatcagacttttaatctgaggggtccaggggtcaagtcctgttcgggc  
g

|        |          |                                                                       |
|--------|----------|-----------------------------------------------------------------------|
|        | 1668771  |                                                                       |
|        | Scaffold |                                                                       |
|        | 76:1885  |                                                                       |
| Lys(   | 47-      | gcccgatagctcagtcggtagagcatcagactttaatctgagggtccagggtcaagtcctgttcgggc  |
| ttt)-4 | 188475   | g                                                                     |
|        | Scaffold |                                                                       |
|        | 19:2702  |                                                                       |
| Lys(   | 418-     | gcccgatagctcagtcggtagagcatcagactttaatctgagggtccagggttcgagtcctgttcgggc |
| ttt)-5 | 2702346  | g                                                                     |
|        | Scaffold |                                                                       |
|        | 9:25671  |                                                                       |
| Lys(   | 46-      | gcccgatagctcagtcggtagagcatcagactttaatctgagggtccagggttcgagtcctgttcgggc |
| ttt)-6 | 2567074  | g                                                                     |
|        | Scaffold |                                                                       |
|        | 9:23097  |                                                                       |
| Lys(   | 17-      | gcttggttagctcagtcggtagagcatcagactttaatctgagggtccagggtcaagtcctgtccgagc |
| ttt)-7 | 2309645  | g                                                                     |
|        | Scaffold |                                                                       |
| Met(   | 112:265  |                                                                       |
| cat)-  | 266-     | agcagagtggcgcagtggaagcgtgctgggccataaccagaggtccgtggatcgaaccacgctct     |
| 1      | 265195   | gcta                                                                  |
|        | Scaffold |                                                                       |
| Met(   | 139:161  |                                                                       |
| cat)-  | 051-     | agcagagtggcgcagtggaagcgtgctgggccataaccagaggtccgtggatcgaaccacgctct     |
| 2      | 160980   | gcta                                                                  |
|        | Scaffold |                                                                       |
| Met(   | 139:162  |                                                                       |
| cat)-  | 351-     | agcagagtggcgcagtggaagcgtgctgggccataaccagaggtccgtggatcgaaccacgctct     |
| 3      | 162280   | gcta                                                                  |
|        | Scaffold |                                                                       |
| Met(   | 14:2566  |                                                                       |
| cat)-  | 072-     | agcagagtggcgcagtggaagcgtgctgggccataaccagaggtccgtggatcgaaccacgctct     |
| 4      | 2566143  | gcta                                                                  |
|        | Scaffold |                                                                       |
| Met(   | 6:38428  |                                                                       |
| cat)-  | 23-      | agcagagtggcgcagtggaagcgtgctgggccataaccagaggtccgtggatcgaaccacgctct     |
| 5      | 3842752  | gcta                                                                  |
|        | Scaffold |                                                                       |
| Met(   | 16:3329  |                                                                       |
| cat)-  | 731-     | agcagagtggcgcagtggaagcgtgctgggccataaccagaggtccgtggatcgaaccatgctctg    |
| 6      | 3329802  | cta                                                                   |
|        | Scaffold |                                                                       |
| Met(   | 9:34576  |                                                                       |
| cat)-  | 9-       | tgctcggtagcgcagtaggcagcgcgtaagtctcataatctaaggctgtagttcgatcctcaccgggg  |
| 7      | 345843   | caa                                                                   |
|        | Scaffold |                                                                       |
| Phe(   | 136:145  |                                                                       |
| gaa)   | 649-     | gccgaaatagctcagttgggagagcgttagactgaagatctaaatgtccccggtcaatcccgggttcgg |
| -1     | 145721   | ca                                                                    |
|        | Scaffold |                                                                       |
| Phe(   | 136:150  |                                                                       |
| gaa)   | 403-     | gccgaaatagctcagttgggagagcgttagactgaagatctaaatgtccccggtcaatcccgggttcgg |
| -2     | 150475   | ca                                                                    |
|        | Scaffold |                                                                       |
| Phe(   | 18:4616  |                                                                       |
| gaa)   | 7-46239  | gccgaaatagctcagttgggagagcgttagactgaagatctaaatgtccccggtcaatcccgggttcgg |
| -3     | 7-46239  | ca                                                                    |

|       |          |                                                                          |
|-------|----------|--------------------------------------------------------------------------|
|       | Scaffold |                                                                          |
| Phe(  | 22:1148  |                                                                          |
| gaa)  | 687-     | gccgaaatagctcagttgggagagcgtagactgaagatctaaatgtccccgggtcaatcccgggttcgg    |
| -4    | 1148615  | ca                                                                       |
|       | Scaffold |                                                                          |
| Phe(  | 44:1108  |                                                                          |
| gaa)  | 890-     | gccgaaatagctcagttgggagagcgtagactgaagatctaaatgtccccgggtcaatcccgggttcgg    |
| -5    | 1108962  | ca                                                                       |
|       | Scaffold |                                                                          |
| Phe(  | 18:2018  |                                                                          |
| gaa)  | 736-     | gccgaaatagctcagctgggagagcgtagactgaagatctgcaggtccccgggtcgatcccgggttcg     |
| -6    | 2018808  | gca                                                                      |
|       | Scaffold |                                                                          |
| Phe(  | 18:2018  |                                                                          |
| gaa)  | 911-     | gccgaaatagctcagctgggagagcgtagactgaagatctgcaggtccccgggtcgatcccgggttcg     |
| -7    | 2018983  | gca                                                                      |
|       | Scaffold |                                                                          |
| Pro(  | 16:3428  |                                                                          |
| agg)  | 701-     |                                                                          |
| -1    | 3428630  | ggtcggttggtctaggggtatgattctcgcttaggggtcgagaggtccccgggtcaaatcccggacgaaccc |
|       | Scaffold |                                                                          |
| Pro(  | 3:18977  |                                                                          |
| agg)  | 33-      |                                                                          |
| -2    | 1897804  | ggtcggttggtctaggggtatgattctcgcttaggggtcgagaggtccccgggtcaaatcccggacgaaccc |
|       | Scaffold |                                                                          |
| Pro(  | 16:2373  |                                                                          |
| agg)  | 506-     |                                                                          |
| -3    | 2373577  | ggtcagtggtctaggggtatgattctcgcttaggggtcgagaggtccccgggtcaaatcccggctgaaccc  |
|       | Scaffold |                                                                          |
| Pro(  | 6:34026  |                                                                          |
| agg)  | 91-      |                                                                          |
| -4    | 3402620  | ggtcagtggtctaggggtatgattctcgcttaggggtcgagaggtccccgggtcaaatcccggctgaaccc  |
|       | Scaffold |                                                                          |
| Pro(  | 6:34028  |                                                                          |
| agg)  | 93-      |                                                                          |
| -5    | 3402822  | ggtcagtggtctaggggtatgattctcgcttaggggtcgagaggtccccgggtcaaatcccggctgaaccc  |
|       | Scaffold |                                                                          |
| Pro(  | 19:2360  |                                                                          |
| agg)  | 576-     |                                                                          |
| -6    | 2360504  | gctcgttgatctaggggtatgattctcgcttaggggtcgagaggtccccgggtcaaatcccggaacgagccc |
|       | Scaffold |                                                                          |
| Pro(  | 16:2915  |                                                                          |
| cgg)  | 911-     |                                                                          |
| -1    | 2915982  | ggctcgttggtctaggggtatgattctcgcttaggggtcgagaggtccccgggtcaaatcccggacgagccc |
|       | Scaffold |                                                                          |
| Pro(  | 16:2374  |                                                                          |
| cgg)  | 331-     |                                                                          |
| -2    | 2374259  | ggctcagtggtctaggggtatgattctcgcttaggggtcgagaggtccccgggtcaaatcccggctgagccc |
|       | Scaffold |                                                                          |
| Pro(  | 40:9263  |                                                                          |
| tgg)- | 65-      |                                                                          |
| 1     | 926294   | ggcctcttggtctaggggtatgattctgcttaggggtgcaggaggtccccgggtcaaatcccggaggggccc |
|       | Scaffold |                                                                          |
| Pro(  | 40:9269  |                                                                          |
| tgg)- | 22-      |                                                                          |
| 2     | 926851   | ggcctcttggtctaggggtatgattctgcttaggggtgcaggaggtccccgggtcaaatcccggaggggccc |

Scaffold  
 Pro( 16:2364  
 tgg)- 362-  
 3 2364433 ggctcagtggtctaggggatgattctcgcttgggtgagagaggccccgggtcaaatccccggctgagccc  
 Scaffold  
 Pro( 16:2375  
 tgg)- 325-  
 4 2375254 ggctcagtggtctaggggatgattctcgcttgggtgagagaggccccgggtcaaatccccggctgagccc  
 Scaffold  
 Pro( 16:2375  
 tgg)- 921-  
 5 2375850 ggctcagtggtctaggggatgattctcgcttgggtgagagaggccccgggtcaaatccccggctgagccc  
 Scaffold  
 Pro( 16:2380  
 tgg)- 219-  
 6 2380290 ggctcagtggtctaggggatgattctcgcttgggtgagagaggccccgggtcaaatccccggctgagccc  
 Scaffold  
 Ser( 174:121  
 aga) 495-  
 -1 121414 gcagtcgtggccgagtggttaaggcgtctgactagaaatcagattccctctgggagcgtaggttcgagtct  
 accgactgcg  
 Scaffold  
 Ser( 174:124  
 aga) 276-  
 -2 124357 gcagtcgtggccgagtggttaaggcgtctgactagaaatcagattccctctgggagcgtaggttcgagtct  
 accgactgcg  
 Ser( Scaffold  
 aga) 18:5310-  
 -3 5229 gcagtcgtggccgagtggttaaggcgtctgactagaaatcagattccctctgggagcgtaggttcgagtct  
 accgactgcg  
 Scaffold  
 Ser( 16:2130  
 cga) 964-  
 -1 2131045 gctgcggtgtccgagtggttaaggagtcagactcgaaatctgatgggctatgcccgcacaggttcgaatcc  
 tgtccgcagcg  
 Scaffold  
 Ser( 23:2005  
 cga) 025-  
 -2 2004944 gctgcggtgtccgagtggttaaggagtcagactcgaaatctgatgggctatgcccgcacaggttcgaatcc  
 tgtccgcagcg  
 Scaffold  
 Ser( 6:29902  
 cga) 28-  
 -3 2990309 gctgcggtgtccgagtggttaaggagtcagactcgaaatctgatgggctatgcccgcacaggttcgaatcc  
 tgtccgcagcg  
 Scaffold  
 Ser( 1:29395  
 gct)- 38-  
 1 2939457 gacgaggtggccgagtggttaaggcgttgactgctaataccaatgtgctctgcacgcgtgggttcgaatcc  
 catcctcgtcg  
 Scaffold  
 Ser( 38:1705  
 gct)- 742-  
 2 1705823 gacgaggtggccgagtggttaaggcgttgactgctaataccaatgtgctctgcacgcgtgggttcgaatcc  
 catcctcgtcg  
 Scaffold  
 Ser( 100:358  
 gct)- 125-  
 3 358208 tgacgaggtggccgagtggttaaggcgttgactgctaataccaatgtgctctgcacgcgtgggttcgaatcc  
 catcctcgtcga  
 Scaffold  
 Ser( 20:2002  
 gct)- 786-  
 4 2002869 tgacgaggtggccgagtggttaaggcgttgactgctaataccaatgtgctctgcacgcgtgggttcgaatcc  
 catcctcgtcga  
 Ser( Scaffold  
 gct)- 2002869  
 4 2002869 tgacgaggtggccgagtggttaaggcgttgactgctaataccaatgtgctctgcacgcgtgggttcgaatcc  
 catcctcgtcga  
 Ser( Scaffold  
 gct)- 2002869  
 4 2002869 gctgcggtgtccgagcggtaaggagatggactgaaatccattgggttctaccgcacaggttcgaatcc

|                    |                                        |                                                                                     |
|--------------------|----------------------------------------|-------------------------------------------------------------------------------------|
| tga)-<br>1         | 11:4164<br>56-<br>416375<br>Scaffold   | gtccgcagcg                                                                          |
| Ser(<br>tga)-<br>2 | 14:2735<br>75-<br>273494<br>Scaffold   | gctgcggtgtccgagcggtaagagatggactgaaatccattgggttctacccgcacaggttcgaatcct<br>gtccgcagcg |
| Thr(<br>agt)-<br>1 | 3:19058<br>70-<br>1905797<br>Scaffold  | ggcgccgtggcttagttggttaaagcgcctgtctagtaaacaggagatcgaggggttcgaatccctccgggg<br>cct     |
| Thr(<br>agt)-<br>2 | 37:8379<br>11-<br>837984<br>Scaffold   | ggcgccgtggcttagttggttaaagcgcctgtctagtaaacaggagatcgaggggttcgaatccctccgggg<br>cct     |
| Thr(<br>agt)-<br>3 | 127:331<br>821-<br>331894<br>Scaffold  | ggcgccgtggcttagttggttaaagcgcctgtctagtaaacaggagatcgaggggttcgaatcccccggg<br>gcct      |
| Thr(<br>agt)-<br>4 | 19:2361<br>065-<br>2361138<br>Scaffold | ggcgccgtggcttagttggttaaagcgcctgtctagtaaacaggagatcgaggggttcgaatcccccggg<br>gcct      |
| Thr(<br>agt)-<br>5 | 38:1706<br>428-<br>1706355<br>Scaffold | ggcgccgtggcttagttggttaaagcgcctgtctagtaaacaggagatcgaggggttcgaatcccccggg<br>gcct      |
| Thr(<br>cgt)-<br>1 | 127:230<br>914-<br>230843<br>Scaffold  | gcctcttagctcagtggtagagcactggtctcgtaaaccaggggtcgtgagttcaaacctcacaggaggc<br>a         |
| Thr(<br>cgt)-<br>2 | 136:173<br>645-<br>173716<br>Scaffold  | gcctcttagctcagtggtagagcactggtctcgtaaaccaggggtcgtgagttcaaacctcacaggaggc<br>a         |
| Thr(<br>cgt)-<br>3 | 43:4165<br>02-<br>416431<br>Scaffold   | gcctcttagctcagtggtagagcactggtctcgtaaaccaggggtcgtgagttcaaacctcacaggaggc<br>a         |
| Thr(t<br>gt)-1     | 116:687<br>501-<br>687573<br>Scaffold  | gcctccatagctcaggggttagagcactggtctgtaaaccaggggtcgtgagttcaaacctctctggggg<br>ca        |
| Thr(t<br>gt)-2     | 2:34292<br>57-<br>3429185<br>Scaffold  | gcctccatagctcaggggttagagcactggtctgtaaaccaggggtcgtgagttcaaacctctctggggg<br>ca        |
| Trp(<br>cca)<br>-1 | 24:6670<br>87-<br>667159<br>Scaffold   | gacttcgtggcgcaacggtagcgcgtctgactccagatcagaaggttcggtgtcaaatacagtcggggtc<br>ac        |
| Trp(<br>cca)<br>-2 | 24:6701<br>50-<br>670222<br>Scaffold   | gacttcgtggcgcaacggtagcgcgtctgactccagatcagaaggttcggtgtcaaatacagtcgaggtc<br>ac        |
| Trp(<br>cca)       | Scaffold                               | gactccgtggcgcaacggtagcgcgtctgactccagatcagaaggttcggtgtcaaatacagtcggggtc              |

cca) 3:42692- a  
-3 42763  
Scaffold

Trp( 5:35823  
cca) 56- gactccgtggcgcaacggtagcgctgactccagatcagaaggtgctgttcaaatcacgtcggggtc  
-4 3582427 a  
Scaffold

Tyr.l 5:39719  
.GT 16- CCTTCGATAGCTCAGTTGGTAGAGCGGTGGACTGTAGtaggtttatacaatatag  
A-1 3971824 aaATCCATAGGtCGCTGGTTCAAATCCGGCTCGAAGGA  
Scaffold

Tyr.l 17:6493  
.GT 81- CCTTCGATAGCTCAGTTGGTAGAGCGGTGGACTGTAGTtggtttattaacaataaa  
A-2 649279 tgaatcagaaATCCATAGGtCGCTGGTTCAAATCCGGCTCGAAGGA  
Scaffold

Tyr.l 17:6530  
.GT 25- CCTTCGATAGCTCAGTTGGTAGAGCGGTGGACTGTAGTtggcttacaacaaaa  
A-3 652930 tcagaaATCCATAGGtCGCTGGTTCAAATCCGGCTCGAAGGA  
Scaffold

Tyr.l 17:6489  
.GT 88- CCTTCGATAGCTCAGTTGGTAGAGCGGTGGACTGTAGTtgggtttaacaaaaatc  
A-4 648894 agaaATCCATAGGtCGCTGGTTCAAATCCGGCTCGAAGGA  
Scaffold

Tyr.l 7:34036  
.GT 98- CCTTCGATAGCTCAGTTGGTAGAGCGGTGGACTGTAGTtggatgattcaagacg  
A-5 3403791 gaaATCCATAGGtCGCTGGTTCAAATCCGGCTCGAAGGA  
Scaffold

Tyr.l 17:6504  
.GT 68- CCTTCGATAGCTCAGTTGGTAGAGCGGTGGACTGTAGTtggcattaacaaaaat  
A-6 650562 cagaaATCCATAGGtCGCTGGTTCAAATCCGGCTCGAAGGA  
Scaffold

Tyr.l 17:6533  
.GT 74- CCTTCGATAGCTCAGTTGGTAGAGCGGTGGACTGTAGTtggcattaacgaaat  
A-7 653280 cagaaATCCATAGGtCGCTGGTTCAAATCCGGCTCGAAGGA  
Scaffold

Tyr.l 19:1460  
.GT 941- CCTTCGATAGCTCAGTTGGTAGAGCGGTGGACTGTAGtcggttaattaacgaattt  
A-8 1460843 gtcagaaATCCATAGGtCGCTGGTTCAAATCCGGCTCGAAGGA  
Scaffold

Tyr.l 19:1460  
.GT 475- CCTTCGATAGCTCAGTTGGTAGAGCGGTGGACTGTAGTtggccaaaaacaaaa  
A-9 1460381 tcagaaATCCATAGGtCGCTGGTTCAAATCCGGCTCGAAGGA  
Scaffold

Val( 20:1852  
aac) 080- tgtttccgtggtgtagtggttatcacatccgcctaacacgcggaagggtccccggttcgatccccgggcgga  
-1 1852154 cat  
Scaffold

Val( 5:40096  
aac) 89- gtttcggtgtagtggttatcacatccgcctaacacgcggaagggtccccggttcgatccccgggcgaaaac  
-2 4009617 a  
Scaffold

Val( 20:1853  
aac) 127- gttccgtggtgtagtggttatcacatccgcctaacacgcggaagggtccccggttcgatccccgggcgga  
-3 1853199 ca  
Scaffold gttccgtggtgtagtggttatcacatccgcctaacacgcggaagggtccccggttcgatccccgggcgga  
aac) 20:1854 ca



|               |                             |                                                                               |
|---------------|-----------------------------|-------------------------------------------------------------------------------|
| -4            | 222-<br>1854294<br>Scaffold |                                                                               |
| Val(<br>aac)  | 23:1784<br>633-             | gtttccgtggtgtagtggttatcacatccgcctaacacgcggaagggtccccgggtcgcgatccccgggcgaaa    |
| -5            | 1784705<br>Scaffold         | ca                                                                            |
| Val(<br>aac)  | 2:25869<br>94-              | gtttccgtggtgtagtggttatcacatccgcctaacacgcggaagggtccccgggtcgcgatccccgggcgaaaac  |
| -6            | 2586922<br>Scaffold         | a                                                                             |
| Val(<br>aac)  | 5:40091<br>23-              | gtttccgtggtgtagtggttatcacatccgcctaacacgcggaagggtccccgggtcgcgatccccgggcgaaaac  |
| -7            | 4009051<br>Scaffold         | a                                                                             |
| Val(<br>cac)  | 3:13984<br>86-              | gtttccgtagtgtagtggttatcacgtgtgcttcacacgcacaagggtccccgggtcgcgatccccgggcgaaaac  |
| -1            | 1398414<br>Scaffold         | a                                                                             |
| Val(<br>cac)  | 20:5424<br>25-              | gtttccgtagtgtagtggttatcacgtgtgcttcacacgcacaagggtccccgggtcgaaccgggcgaaaac      |
| -2            | 542353<br>Scaffold          | a                                                                             |
| Val(<br>cac)  | 20:5438<br>02-              | gtttccgtagtgtagtggttatcacgtgtgcttcacacgcacaagggtccccgggtcgaaccgggcgaaaac      |
| -3            | 543730<br>Scaffold          | a                                                                             |
| Val(t<br>ac)- | 74:1152<br>85-              | ggttccgtggtgtagcgggttatcacgtctgctttacacgcagaagggtcgccgggtcgcgatccccggccggaatc |
| 1             | 115212<br>Scaffold          | ac                                                                            |
| Val(t<br>ac)- | 109:405<br>168-             | ggttccgtggtgtagcgggttatcacgtctgctttacacgcagaagggtcgccaggtcgcgatccccggccggaacc |
| 2             | 405096<br>Scaffold          | a                                                                             |
| Val(t<br>ac)- | 7:49885<br>8-               | ggttccgtggtgtagcgggttatcacgtctgctttacacgcagaagggtcgccaggtcgcgatccccggccggaacc |
| 3             | 498930                      | a                                                                             |

Supplementary Table 1b. List of honey bee tRNA genes.

| Gene id     | Position                                                                          | Sequence                                                                   |
|-------------|-----------------------------------------------------------------------------------|----------------------------------------------------------------------------|
| Ala(aggc)-1 | Group16.<br>19:74180-2-741730                                                     | gggggcgtagctcagatggtagagcgctcgcttagcatgagaggtaccgggatcgatgcccggcgcctcca    |
| Ala(aggc)-2 | Group4.1<br>1:26137-26065                                                         | gggggcgtagctcagatggtagagcgctcgcttagcatgagaggtaccgggatcgatgcccggcgcctcca    |
| Ala(aggc)-3 | Group4.1<br>1:45143-45071                                                         | gggggcgtagctcagatggtagagcgctcgcttagcatgagaggtaccgggatcgatgcccggcgcctcca    |
| Ala(aggc)-4 | Group4.8:<br>58903-58975                                                          | gggggcgtagctcagatggtagagcgctcgcttagcatgagaggtaccgggatcgatgcccggcgcctcca    |
| Ala(aggc)-5 | Group7.3<br>7:202242-202170                                                       | gggggcgtagctcagatggtagagcgctcgcttagcatgagaggtaccgggatcgatgcccggcgcctcca    |
| Ala(aggc)-6 | Group7.3<br>7:203068-202996                                                       | gggggcgtagctcagatggtagagcgctcgcttagcatgagaggtaccgggatcgatgcccggcgcctcca    |
| Ala(aggc)-7 | Group7.3<br>7:203376-203304                                                       | gggggcgtagctcagatggtagagcgctcgcttagcatgagaggtaccgggatcgatgcccggcgcctcca    |
| Ala(cgc)-1  | Group15.<br>29:72798-6-728059                                                     | tgggggtgtaactcagtggttagagtgtctgcttcgatgctgaaagtctgggttcaaataccagctacctccaa |
| Ala(cgc)-2  | Group15.<br>34:204620-204691                                                      | gggggtgtaactcagtggttagagtgtctgcttcgatgctgaaagtctgggttcaaataccagctacctccaa  |
| Ala(ggc)-1  | Group6.3<br>8:125920-125849                                                       | ccctggatagcttaatggttaaagcagtcgcctggcaagcgaagatccgggttcgattcccgggtccaggca   |
| Ala(tcgc)-1 | Group11.<br>41:12839-9-128470                                                     | tggggatgtagctcagtggttagagcgcttcgcttgcgatgaaaggccccgggttcgatccccggcatctccaa |
| Ala(tcgc)-2 | Group2.3<br>3:338066-338139                                                       | ggggatgtagctcagtggttagagcgcttcgcttgcgatgaaaggccccgggttcgatccccggcatctccaa  |
| Ala(tcgc)-3 | Group2.3<br>3:346764-346835                                                       | ggggatgtagctcagtggttagagcgcttcgcttgcgatgaaaggccccgggttcgatccccggcatctccaa  |
| Ala(tcgc)-4 | GroupUn.<br>595:1118-4-11111                                                      | ggggatgtagctcagtggttagagcgcttcgcttgcgatgaaaggccccgggttcgatccccggcatctccaa  |
| Arg(acg)-1  | Group11.<br>38:7858-7930                                                          | ggtcctgtggcgcaacggataacgcgtctgactacggatcagaagattccaggttcgaatcctggcaggatcg  |
| Arg(acg)-2  | Group4.1<br>2:289393-289465                                                       | ggtcctgtggcgcaacggataacgcgtctgactacggatcagaagattccaggttcgaatcctggcaggatcg  |
| Arg(acg)    | Group6.1<br>ggtcctgtggcgcaacggataacgcgtctgactacggatcagaagattccaggttcgaatcctggcagg |                                                                            |

|       |           |                                                                          |
|-------|-----------|--------------------------------------------------------------------------|
| acg)  | 8:39624-  | atcg                                                                     |
| -3    | 39552     |                                                                          |
| Arg(  | Group8.1  |                                                                          |
| acg)  | 8:127876  | ggtcctgtggcgcaacggataacgcgtctgactacggatcagaagattccaggttcgaatcctggcagg    |
| -4    | -127804   | atcg                                                                     |
| Arg(  | GroupUn.  |                                                                          |
| acg)  | 8645:710  | ggtcctgtggcgcaacggataacgcgtctgactacggatcagaagattccaggttcgaatcctggcagg    |
| -5    | 4-7032    | atcg                                                                     |
| Arg(  | Group10.  |                                                                          |
| cct)- | 9:88775-  | gcctctgtggcctaataaggataaggcatcggtctcctaaaccggggattgtgggttcgagtcccaccagag |
| 1     | 88847     | gta                                                                      |
| Arg(  | Group15.  |                                                                          |
| cct)- | 13:16134  | gcccctgtggcctaataaggataaggcatcggtctcctaaaccggggattgtgggttcgagtcccaccaggg |
| 2     | -16206    | gta                                                                      |
| Arg(  | Group9.7: |                                                                          |
| cct)- | 99996-    | gcccctgtggcctaataaggataaggcatcggtctcctaaaccggggattgtgggttcgagtcccaccaggg |
| 3     | 100068    | gta                                                                      |
| Arg(  | GroupUn.  |                                                                          |
| cct)- | 532:3986  | gcccctgtggcctaataaggataaggcatcggtctcctaaaccggggattgtgggttcgagtcccaccaggg |
| 4     | 4-39792   | gta                                                                      |
| Arg(t | Group1.2  |                                                                          |
| cg)-  | 7:108486  | gaccgtgtggcctaacggataaggcgtcggactcggatccgaagattgcaggttcgagtcctgtcacgg    |
| 1     | -108414   | tcg                                                                      |
| Arg(t | Group12.  |                                                                          |
| cg)-  | 27:11032  | tgaccgtgtggcctaataaggataaggcgtcggactcggatccgaagattgcaggttcgagtcctgtcacg  |
| 2     | 0-110246  | gtcgt                                                                    |
| Arg(t | Group3.1  |                                                                          |
| cg)-  | 3:46968-  | tgaccgtgtggcctaacggataaggcgtcggactcggatccgaagattgcaggttcgaatcctgtcacg    |
| 3     | 47042     | gtcga                                                                    |
|       | Group3.3  |                                                                          |
| Arg(t | 8:382894  | gtccctttggcgagaggatagcgcgttgacttctaatacctaaagggtcgcgggttcgatccccgcaaggg  |
| ct)-1 | -382966   | atg                                                                      |
| Asn(  | Group10.  |                                                                          |
| gtt)- | 37:20438  | tgctccgtggcgcaatcggctagcgcgttcggctgtaaccgaaaggttggtggttcgagcccaccgg      |
| 1     | 3-204310  | gggca                                                                    |
| Asn(  | Group13.  |                                                                          |
| gtt)- | 6:497332  | gcctccgtggcgcaatcggctagcgcgttcggctgtaaccgaaaggttggtggttcgagcccaccggg     |
| 2     | -497259   | ggcg                                                                     |
| Asn(  | Group3.2  |                                                                          |
| gtt)- | 5:935588  | gcctccgtggcgcaatcggctagcgcgttcggctgtaaccgaaaggttggtggttcgagcccaccgg      |
| 3     | -935663   | gggca                                                                    |
| Asn(  | Group5.2  |                                                                          |
| gtt)- | 7:128002  | gcctccgtggcgcaatcggctagcgcgttcggctgtaaccgaaaggttggtggttcgagcccaccgg      |
| 4     | -127929   | gggca                                                                    |
| Asn(  | Group6.5  |                                                                          |
| gtt)- | 5:647432  | gcctccgtggcgcaatcggctagcgcgttcggctgtaaccgaaaggttggtggttcgagcccaccgg      |
| 5     | -647505   | gggca                                                                    |
| Asn(  | GroupUn.  |                                                                          |
| gtt)- | 245:7337  | gcctccgtggcgcaatcggctagcgcgttcggctgtaaccgaaaggttggtggttcgagcccaccgg      |
| 6     | -7410     | gggca                                                                    |
| Asn(  | GroupUn.  |                                                                          |
| gtt)- | 570:8255  | gcctccgtggcgcaatcggctagcgcgttcggctgtaaccgaaaggttggtggttcgagcccaccgg      |
| 7     | -8328     | aggca                                                                    |
| Asn(  | GroupUn.  |                                                                          |
| gtt)- | 9201:348  | gcctccgtggcgcaatcggctagcgcgttcggctgtaaccgaaaggttggtggttcgatcccacctggg    |
| 8     | 9-3416    | ggcg                                                                     |

|                 |                                  |                                                                                |
|-----------------|----------------------------------|--------------------------------------------------------------------------------|
| Asp( gtc)-<br>1 | Group10.<br>37:20235<br>0-202277 | ttctcgatagatagtggtcagatccccgcctgtcacgaggagaccggggttcgattccccgtcgggg<br>aga     |
| Asp( gtc)-<br>2 | Group10.<br>45:24540<br>9-245482 | ttctcggtagatagtggttagtatccccgcctgtcacgaggagaccggggttcgattccccgccgggg<br>aga    |
| Asp( gtc)-<br>3 | Group4.1<br>2:270915<br>-270842  | tcctcgtagtatagtggttagtatccccgcctgtcacgaggagaccggggttcgattccccgacgggga<br>g     |
| Asp( gtc)-<br>4 | Group8.2<br>0:977336<br>-977409  | tcctcgtagtatagtggttagtatccccgcctgtcacgaggagaccggggttcgattccccgacgggga<br>g     |
| Asp( gtc)-<br>5 | Group8.2<br>7:23288-<br>23217    | ttctcggtagatagtggtcagatccccgcctgtcacgaggagaccggggttcgattccccgccgggg<br>ag      |
| Asp( gtc)-<br>6 | Group8.2<br>7:24089-<br>24018    | ttctcggtagatagtggtcagatccccgcctgtcacgaggagaccggggttcgattccccgccgggg<br>ag      |
| Asp( gtc)-<br>7 | Group9.6:<br>36353-<br>36282     | ttctcggtagatagtggtcagatccccgcctgtcacgaggagaccggggttcgattccccgccgggg<br>ag      |
| Asp( gtc)-<br>8 | GroupUn.<br>1359:128<br>1-1210   | ttctcggtagatagtggtcagatccccgcctgtcacgaggagaccggggttcgattccccgccgggg<br>aga     |
| Asp( gtc)-<br>9 | GroupUn.<br>72:3705-<br>3776     | ttctcggtagatagtggtcagatccccgcctgtcacgaggagaccggggttcgattccccgccgggg<br>aga     |
| Cys( gca)<br>-1 | Group16.<br>19:73260<br>7-732536 | aggggtatagctcagtggttagagcattcgactgcagatcgagaggtccccgggtcaaaccgggtgcc<br>cctg   |
| Cys( gca)<br>-2 | Group5.7:<br>266057-<br>266130   | gggggtatagctcagtggttagagcattcgactgcagatcgagaggtccccgggtcaaaccgggtgcc<br>cct    |
| Cys( gca)<br>-3 | GroupUn.<br>357:1859<br>9-18672  | gggggtatagctcagtggttagagcattcgactgcagatcgagaggtccccgggtcaaaccgggtgcc<br>cct    |
| Gln( ctg)-<br>1 | Group1.1:<br>1059487-<br>1059561 | aggtctcatggtgtaacggctagcactctggactctgaatccagcgatccgagttcaaatctcggtagac<br>cttc |
| Gln( ctg)-<br>2 | Group11.<br>11:16693<br>9-166868 | gggtctcatggtgtaatggctagcactctggactctgaatccagcgatccgagttcaaatctcggtagac<br>ctt  |
| Gln( ctg)-<br>3 | Group2.3<br>3:346324<br>-346251  | aggttccatggtgtaatggctagcactctggactctgaatccagcgatccgagttcaagtctcggtagaac<br>ctg |
| Gln( ctg)-<br>4 | Group2.3<br>3:718918<br>-718991  | aggttccatggtgtaatggctagcactctggactctgaatccagcgatccgagttcaagtctcggtagaac<br>ctg |
| Gln( ctg)-<br>5 | Group2.3<br>3:719873<br>-719944  | gggtccatggtgtaatggtagcactctggactctgaatccagcgatccgagttcaaatctcggtagaacct        |
| Gln( ctg)-<br>6 | Group2.3<br>3:725060<br>-725133  | gggtccatggtgtaatggtagcactctggactctgaatccagcgatccgagttcaaatctcggtagaacct        |
| Gln( ctg)-      | Group2.3<br>3:726006             | gggtccatggtgtaatggtagcactctggactctgaatccagcgatccgagttcaaatctcggtagaacct        |

|       |          |                                                                           |
|-------|----------|---------------------------------------------------------------------------|
| 7     | -726077  |                                                                           |
| Gln(  | Group2.3 |                                                                           |
| ctg)- | 7:433082 |                                                                           |
| 8     | -433011  | gggtccatggtgtaatggttagcactctggactctgaatccagcgatccgaggtcaaatctcgggtgggacct |
|       | Group2.3 |                                                                           |
| Gln(t | 3:718762 |                                                                           |
| tg)-1 | -718833  | gggtccatggtgtaatggttagcactctggacttgaatccagcgatccgaggtcaagtctcgggtggaacct  |
|       | Group2.3 |                                                                           |
| Gln(t | 3:719546 |                                                                           |
| tg)-2 | -719619  | gggtccatggtgtaatggttagcactctggacttgaatccagcgatccgaggtcaagtctcgggtggaacct  |
|       | Group2.3 |                                                                           |
| Gln(t | 3:719709 |                                                                           |
| tg)-3 | -719782  | gggtccatggtgtaatggttagcactctggacttgaatccagcgatccgaggtcaaatctcgggtgggacct  |
|       | Group2.3 |                                                                           |
| Gln(t | 3:724582 |                                                                           |
| tg)-4 | -724653  | gggtccatggtgtaatggttagcactctggacttgaatccagcgatccgaggtcaaatctcgggtgggacct  |
|       | Group2.3 |                                                                           |
| Gln(t | 3:724738 |                                                                           |
| tg)-5 | -724809  | aggttccatggtgtaatggttagcactctggacttgaatccagcgatccgaggtcaaatctcgggtggaac   |
|       | Group2.3 | ctg                                                                       |
| Gln(t | 3:724903 |                                                                           |
| tg)-6 | -724974  | aggttccatggtgtaatggttagcactctggacttgaatccagcgatccgaggtcaaatctcgggtggaac   |
|       | Group2.3 | ctg                                                                       |
| Gln(t | 3:725679 |                                                                           |
| tg)-7 | -725752  | aggttccatggtgtaatggttagcactctggacttgaatccagcgatccgaggtcaaatctcgggtggaacc  |
|       | Group2.3 | tg                                                                        |
| Gln(t | 3:725842 |                                                                           |
| tg)-8 | -725915  | aggttccatggtgtaatggttagcactctggacttgaatccagcgatccgaggtcaaatctcgggtggaacc  |
|       | Group2.3 | tg                                                                        |
| Gln(t | 3:733442 |                                                                           |
| tg)-9 | -733371  | gggtccatggtgtaatggcaagcactctggacttgaatccagcgatccgaggtcaagtctcgggtggaacct  |
| Gln(t | GroupUn. |                                                                           |
| tg)-  | 59:40573 |                                                                           |
| 10    | -40644   | gggtccatggtgtaatggttagcactctggacttgaatccagcgatccgaggtcaaatctcgggtggaacct  |
| Glu(  | Group13. |                                                                           |
| ctc)- | 11:19244 | tccggtatggtctagtggttaggatacctggctctcaccaggaggctcgggttcgattcccggtagccgga   |
| 1     | 2-192513 | a                                                                         |
| Glu(  | Group4.1 |                                                                           |
| ctc)- | 2:527014 | tccggtatggtctagtggttaggatacctggctctcaccaggaggctcgggttcgattcccggtagccgga   |
| 2     | -526943  | a                                                                         |
|       | Group4.1 |                                                                           |
| Glu(  | 3:100942 |                                                                           |
| ctc)- | 8-       | tccggtatggtctagtggttaggatacctggctctcaccaggaggctcgggttcgattcccggtagccgga   |
| 3     | 1009357  | a                                                                         |
|       | Group4.1 |                                                                           |
| Glu(  | 3:104156 |                                                                           |
| ctc)- | 4-       | tccggtatggtctagtggttaggatacctggctctcaccaggaggctcgggttcgattcccggtagccgga   |
| 4     | 1041493  | a                                                                         |
| Glu(  | Group9.2 |                                                                           |
| ctc)- | 1:75307- | tccggtatggtctagtggttaggatacctggctctcaccaggaggctcgggttcgattcccggtagccgga   |
| 5     | 75236    | a                                                                         |
|       | Group4.1 |                                                                           |
| Glu(t | 2:263659 |                                                                           |
| tc)-1 | -263730  | tccggtatggtctagtggttaggatacctggcttccaccaggaggctcgggttcgattcccggtagccgga   |
|       | Group4.1 | a                                                                         |
| Glu(t | 3:100703 |                                                                           |
| tc)-2 |          | tccggtatggtctagtggttaggatacctggcttccaccaggaggctcgggttcgattcccggtagccgga   |
|       |          | a                                                                         |

1-  
 1006960  
 Group4.1  
 3:100725  
 Glu(tc)-3 9- 1007188 tccggtatggtctagtggttaggatacctggcttcacccaggaggctcgggttcgattcccgggtaccgga  
 Group4.1  
 3:104207  
 Glu(tc)-4 9- 1042008 tccggtatggtctagtggttaggatacctggcttcacccaggaggctcgggttcgattcccgggtaccgga  
 Group4.1  
 3:104425  
 Glu(tc)-5 6- 1044185 tccggtatggtctagtggttaggatacctggcttcacccaggaggctcgggttcgattcccgggtaccgga  
 Group4.1  
 3:104752  
 Glu(tc)-6 2- 1047451 tccggtatggtctagtggttaggatacctggcttcacccaggaggctcgggttcgattcccgggtaccgga  
 Group14.  
 23:49265  
 Gly(ccc)-1 1-492581 gcactgctgggtagtggtatcatgcaagattcccattcttgcgacccgggttcgattcccgggagtgca  
 Group4.1  
 2:392061  
 Gly(cc)-1 2:392061 gcatcggtggtcagtggtagaatgctcgctgccacgcgggcgggccgggttcgattcccggccgatgc  
 -1 -392131 a  
 Group4.9:  
 275293-  
 Gly(cc)-2 275293- gcatcggtggtcagtggtagaatgctcgctgccacgcgggcgggccgggttcgattcccggccgatgc  
 275363 a  
 Group4.9:  
 275669-  
 Gly(cc)-3 275669- gcatcggtggtcagtggtagaatgctcgctgccacgcgggcgggccgggttcgattcccggccgatgc  
 275739 a  
 Group4.9:  
 277549-  
 Gly(cc)-4 277549- gcatcggtggtcagtggtagaatgctcgctgccacgcgggcgggccgggttcgattcccggccgatgc  
 277619 a  
 Group4.9:  
 351405-  
 Gly(cc)-5 351405- gcatcggtggtcagtggtagaatgctcgctgccacgcgggcgggccgggttcgattcccggccgatgc  
 351335 a  
 Group8.2  
 0:327155  
 Gly(cc)-6 0:327155 gcatcggtggtcagtggtagaatgctcgctgccacgcgggcgggccgggttcgattcccggccgatgc  
 -327084 a  
 Group8.2  
 7:21318-  
 Gly(cc)-7 7:21318- gcatcggtagttcagtggtagaatgctcgctgccacgcgggcgggccgggttcgattcccggccgatgc  
 21248 a  
 Group8.2  
 7:21936-  
 Gly(cc)-8 7:21936- ccctggatagctcaacggtaagagcagtcgcctgccaagcgaagatccgggttcgattcccgggtcca  
 21866 ggca  
 Group14.  
 23:48937  
 Gly(cc)-1 8-489450 tgcgatggtggtgtaatggtcagcatagttgcctccaagcagttgatccgggttcgattcccggccatcgc  
 Group2.3  
 3:312541  
 Gly(cc)-2 3:312541 tgcgatggtggtgtaatggtcagcatagttgcctccaagcagttgatccgggttcgattcccggccatcgc  
 -312468 ag  
 Group2.3  
 3:312897  
 Gly(cc)-3 3:312897 tgcgatggtggtgtaatggtcagcatagttgcctccaagcagttgatccgggttcgattcccggccatcgc  
 -312824 ag  
 Group2.3  
 3:313063  
 Gly(cc)- 3:313063 tgcgatggtggtgtaatggttagcatagttgcctccaagcagttgatccgggttcgattcccggccatcgca  
 g

|        |           |                                                                         |
|--------|-----------|-------------------------------------------------------------------------|
| 4      | -312990   |                                                                         |
| Gly(t  | Group2.3  |                                                                         |
| cc)-   | 3:313229  | gcgatggtggtgtaatggtgagcatagttgcctccaagcaattgatccgggttcgattcccggccatcgca |
| 5      | -313156   | c                                                                       |
| His(   | Group11.  |                                                                         |
| gtg)-  | 33:17973  | gccgtgatcgctagtggttaggaccctacgttggtggccgtagtaaccaggttcgaatcctggtcacggc  |
| 1      | 8-179809  | a                                                                       |
| His(   | Group15.  |                                                                         |
| gtg)-  | 13:16856  | gccgtgatcgctagtggttaggaccctacgttggtggccgtagtaaccaggttcgaatcctggtcacggc  |
| 2      | -16785    | a                                                                       |
| His(   | Group15.  |                                                                         |
| gtg)-  | 14:7549-  | gccgtgatcgctagtggttaggaccctacgttggtggccgtagtaaccaggttcgaatcctggtcacggc  |
| 3      | 7478      | a                                                                       |
| His(   | Group3.3  |                                                                         |
| gtg)-  | 8:176000  | gccgtgatcgctagtggttaggaccctacgttggtggccgtagtaaccaggttcgaatcctggtcacggc  |
| 4      | -176071   | a                                                                       |
| His(   | GroupUn.  |                                                                         |
| gtg)-  | 5467:855  | gccgtgatcgctagtggttaggaccctacgttggtggccgtagtaaccaggttcgaatcctggtcacggc  |
| 5      | 0-8621    | a                                                                       |
| His(   | GroupUn.  |                                                                         |
| gtg)-  | 5471:50-  | gccgtgatcgctagtggttaggaccctacgttggtggccgtagtaaccaggttcgaatcctggtcacggc  |
| 6      | 121       | a                                                                       |
| His(   | GroupUn.  |                                                                         |
| gtg)-  | 9236:104  | gccgtgatcgctagtggttaggaccctacgttggtggccgtagtaaccaggttcgaatcctggtcacggc  |
| 7      | 21-10350  | a                                                                       |
| Ile(a  | Group1.7  |                                                                         |
| at)-1  | 1:5646-   | tggcccattagctcagtaggtagagcgctgctgtaataacgcgaaggctcggggttcgatcccccatgg   |
|        | 5721      | gccaa                                                                   |
| Ile(a  | Group11.  |                                                                         |
| at)-2  | 38:5049-  | tggcccattagctcagttggttagagcgctgctgtaataacgcgaaggctcggggttcgatcccccatgg  |
|        | 5122      | gccag                                                                   |
| Ile(a  | Group13.  |                                                                         |
| at)-3  | 13:50660  | tggcccattagctcagttggttagagcgctgctgtaataacgcgaaggctcggggttcgatcccccatgg  |
|        | 5-506678  | gccag                                                                   |
| Ile(a  | Group16.  |                                                                         |
| at)-4  | 4:224122  | tggcccattagctcagtaggtagagcgctgctgtaataacgcgaaggctcggtgggttcgatcccccatgg |
|        | -224196   | gccaa                                                                   |
| Ile(a  | Group4.1  |                                                                         |
| at)-5  | 2:264576  | ggcccattagctcagtaggtagagcgctgctgtaataacgcgaaggctcggtgggttcgatcccccatgg  |
|        | -264501   | gccaa                                                                   |
| Ile(a  | Group4.1  |                                                                         |
| at)-6  | 2:289961  | ggcccattagctcagtaggtagagcgctgctgtaataacgcgaaggctcggtgggttcgatcccccatgg  |
|        | -289888   | gccaa                                                                   |
| Ile.I. | Group14.  |                                                                         |
| TAT    | 16:28570  | TCCCCAGTGGCGCAATCGGTtAGCGCACGGTACTTATAagacagtaaattgtg                   |
| -1     | -28663    | agcaATGCCGGGGtTGTGAGTTCGAGCCTCACCTGGGGAA                                |
| Ile.I. | Group14.  |                                                                         |
| TAT    | 24:88807  | GCTCCAGTGGCGCAATTGGTtAGCGCACGGTACTTATAagacagtgatcggtg                   |
| -2     | 9-888171  | agcaATGCCGGGGtTGTGAGTTCGAGCCTCACCTGGAGCA                                |
| Leu(   | Group1.4: |                                                                         |
| aag)   | 122474-   | ggtagcgtggccgagcgggtctaaggcgtggttaaggcaccagctctctcggaggcgtgggttcgaatc   |
| -1     | 122393    | ccaccgctgcc                                                             |
| Leu(   | Group15.  |                                                                         |
| aag)   | 28:19303  | ggtagcgtggccgagcgggtctaaggcgtggttaaggcaccagctctctcggaggcgtgggttcgaatc   |
| -2     | 3-193114  | ccaccgctgcc                                                             |
| Leu(   | Group15.  |                                                                         |
|        |           | tgtcaggatggccgagcgggtctaaggcgtgctgctcaggtcgcagtcactctgtgggctggttcgaat   |

|          |           |                                                                          |
|----------|-----------|--------------------------------------------------------------------------|
| cag)     | 8:46653-  | cccacttctgacaa                                                           |
| -1       | 46569     |                                                                          |
| Leu(     | Group1.8  |                                                                          |
| taa)-    | 2:753189  | gccaggtggccgagcggctaaaggcgcagacttaagtctggtcccaattgggagcgtgggttcgaa       |
| 1        | -753272   | ccccacacctggca                                                           |
| Leu(     | Group2.3  |                                                                          |
| taa)-    | 3:352854  | tgctaggtggccgagcggctaaaggcgcagacttaagtctggtccctctgggagcgtgggttcgaa       |
| 2        | -352770   | ccccacacttagca                                                           |
| Leu(     | Group6.4  |                                                                          |
| taa)-    | 6:87182-  | gccaggtggccgagcggctaaaggcgcagacttaagtctggtcccattgggagcgtgggttcgaa        |
| 3        | 87099     | ccccacacctggca                                                           |
| Leu(     | Group6.5  |                                                                          |
| taa)-    | 5:319604  | gccaggtggccgagcggctaaaggcgcagacttaagtctggtcccattgggagcgtgggttcgaa        |
| 4        | -319521   | ccccacacctggca                                                           |
| Leu(     | Group2.3  |                                                                          |
| tag)-    | 3:345629  | ggcagcgtggccgagcggctaaaggcgtggttttagcaccagtcctgaaggcgtgggttcgaatcc       |
| 1        | -345708   | caccgctgtca                                                              |
| Leu.     | Group12.  | GTCAGGATGGCCGAGCGGTctAAGGCGCCAGACTCAAGggttctaaccttctcag                  |
| I.CA     | 27:13096  | ttcgaaaactgagttctgagcgTTCTGGTCCTCTCTGAGGGCGTGGGTTCGAATC                  |
| A-1      | 1-130840  | CCACTTCTGACA                                                             |
| Leu.     | Group9.2  | GTCAGGATGGCCGAGCGGTctAAGGCGCCAGACTCAAGggttctaaccttctcag                  |
| I.CA     | 1:75914-  | ttcgaaaactgagttctgagcgTTCTGGTCCTCTCTGAGGGCGTGGGTTCGAATC                  |
| A-2      | 75792     | CCACTTCTGACA                                                             |
| Leu.     | GroupUn.  | GTCAGGATGGCCGAGCGGTctAAGGCGCCAGACTCAAGggttaatccccctttcag                 |
| I.CA     | 2755:257  | tccaagactgaatcaatgtgcattctggtctccATCTGGAGGCGTGGGTTCGAATCCCA              |
| A-3      | 1-2450    | CTCCTGACA                                                                |
| Lys(     | Group1.1: |                                                                          |
| ctt)-    | 1044416-  | gcccggctagctcagtcggtagagcatgagactcttaatctcagggctcgtgggttcgagccccacgttgg  |
| 1        | 1044488   | gcg                                                                      |
| Lys(     | Group10.  |                                                                          |
| ctt)-    | 37:20388  | gcccggctagctcagtcggtagagcatgagactcttaatctcagggctcgtgggttcgagccccacgttgg  |
| 2        | 4-203956  | gcg                                                                      |
| Lys(     | Group16.  |                                                                          |
| ctt)-    | 19:44715  | gcccggctagctcagtcggtagagcatgagactcttaatctcagggctcgtgggttcgagccccacgttgg  |
| 3        | 7-447231  | gcg                                                                      |
| Lys(     | Group4.8: |                                                                          |
| ctt)-    | 93619-    | gcccggctagctcagtcggtagagcatgagactcttaatctcagggctcgtgggttcgagccccacgttgg  |
| 4        | 93691     | gcg                                                                      |
| Lys(     | Group4.8: |                                                                          |
| ctt)-    | 148702-   | gcccggctagctcagtcggtagagcatgagactcttaatctcagggctcgtgggttcgagccccacgttgg  |
| 5        | 148774    | gcg                                                                      |
| Lys(     | GroupUn.  |                                                                          |
| ctt)-    | 357:5521  | gcccggctagctcagtcggtagagcatgagactcttaatctcagggctcgtgggttcgagccccacgttgg  |
| 6        | -5449     | gcg                                                                      |
| Lys(     | GroupUn.  |                                                                          |
| ctt)-    | 4566:132  | tgcccggctagctcagtcggtagagcatgagactcttaatctcagggctcgtgggttcgagccccacgttgg |
| 7        | 8-1253    | gcga                                                                     |
| Lys(tt)- | Group15.  |                                                                          |
| 1        | 26:795-   | cgcccggatagctcagtcggtagagcatcagacttttaatctgaggggtccaggggttcgagtcctgttcgg |
|          | 721       | gcga                                                                     |
| Lys(tt)- | Group15.  |                                                                          |
| 2        | 29:58495  | cgcccggatagctcagtcggtagagcatcagacttttaatctgaggggtccaggggttcgagtcctgttcgg |
|          | 3-585026  | gcga                                                                     |
| Lys(tt)- | Group15.  |                                                                          |
| 3        | 34:20268  | cgctggatagctcagtcggtagagcatcagacttttaatctgaggggtccaggggttcgagtcctgttcggg |
|          | 1-202608  | cga                                                                      |



|            |                                  |                                                                               |
|------------|----------------------------------|-------------------------------------------------------------------------------|
|            | Group4.8:                        |                                                                               |
| Lys(tt)-4  | 85527-85453                      | cgctggatagctcagtcggtagagcatcagactttaatctgaggggtccaggggtcagtcctgttcggg<br>cga  |
|            | Group4.8:                        |                                                                               |
| Lys(tt)-5  | 85692-85618                      | tgctggatagctcagtcggtagagcatcagactttaatctgaggggtccaggggtcagtcctgttcggg<br>cgt  |
|            | GroupUn.                         |                                                                               |
| Lys(tt)-6  | 7391:424<br>4-4170               | tgctggatagctcagtcggtagagcatcagactttaatctgaggggtccaggggtcagtcctgttcggg<br>cgt  |
| Met(cat)-1 | Group1.5<br>7:139765<br>-139836  | agcagagtggcgcagtggaagcgtgctgggcccataaccagaggtccgtggatcgaaccacgctc<br>tgcta    |
| Met(cat)-2 | Group13.<br>13:57093<br>7-571008 | agcagagtggcgcagtggaagcgtgctgggcccataaccagaggtccgtggatcgaaccacgctc<br>tgcta    |
| Met(cat)-3 | Group15.<br>13:15532<br>-15458   | agcagagtggcgcagtggaagcgtgctgggcccataaccagaggtccgtggatcgaaccacgctc<br>tgcta    |
| Met(cat)-4 | Group8.2<br>0:870084<br>-870155  | agcagagtggcgcagtggaagcgtgctgggcccataaccagaggtccgtggatcgaaccacgctc<br>tgcta    |
| Met(cat)-5 | Group8.2<br>0:870432<br>-870361  | agcagagtggcgcagtggaagcgtgctgggcccataaccagaggtccgtggatcgaaccacgctc<br>tgcta    |
| Met(cat)-6 | Group8.2<br>0:870860<br>-870931  | agcaggggtggcgcagtggaagcgtgctgggcccataaccagaggtccgtggatcgaaccacgctc<br>tgcta   |
| Met(cat)-7 | GroupUn.<br>357:5089<br>-5160    | tgctcggtagcgcagtaggcagcgcgtaagtctcataatctaaggtcgtgattcgatcctcaccggg<br>gcaa   |
| Phe(gaa)-1 | Group1.7<br>3:71156-<br>71084    | gccgaaatagctcagttgggagagcgtagactgaagatctaaatgtcccgggtcagatcccgggttcg<br>ca    |
| Phe(gaa)-2 | Group11.<br>4:135005<br>-134933  | gccgaaatagctcagttgggagagcgtagactgaagatctaaatgtcccgggtcaatcccgggttcg<br>gca    |
| Phe(gaa)-3 | Group4.5:<br>9454-<br>9526       | gccgaaatagctcagttgggagagcgtagactgaagatctaaatgtcccgggtcaatcccgggttcg<br>gca    |
| Phe(gaa)-4 | Group6.3<br>8:168377<br>-168449  | gccgaaatagctcagttgggagagcgtagactgaagatctaaatgtcccgggtcaatcccgggttcg<br>gca    |
| Phe(gaa)-5 | GroupUn.<br>81:2865-<br>2793     | gccgaaatagctcagttgggagagcgtagactgaagatctaaatgtcccgggtcagatcccgggttcg<br>gca   |
| Phe(gaa)-6 | GroupUn.<br>81:3185-<br>3113     | gccgaaatagctcagttgggagagcgtagactgaagatctaaagggtcccgggtcaatcccgggttcg<br>gca   |
| Pro(agg)-1 | Group16.<br>19:74288<br>6-742815 | ggctcgttggtctaggggtatgattctcgcttaggggtcgcgagaggtcccgggtcaaatcccggacgagcc<br>c |
| Pro(agg)-2 | Group16.<br>20:3409-<br>3338     | ggctcgttggtctaggggtatgattctcgcttaggggtcgcgagaggtcccgggtcaaatcccggacgagcc<br>c |
| Pro(agg)   | Group4.2<br>3:678509             | ggctcgttggtctaggggtatgattctcgcttaggggtcgcgagaggtcccgggtcaaatcccggacgagcc<br>c |

|          |                                                                                   |                                                                           |
|----------|-----------------------------------------------------------------------------------|---------------------------------------------------------------------------|
| -3       | -678438                                                                           |                                                                           |
| Pro(agg) | GroupUn. 7179:188                                                                 | ggctcgttggtctaggggatgattctcgcttaggggtgcgagaggtcccgggtcaaatacccggacgagcc   |
| -4       | -117                                                                              | c                                                                         |
| Pro(cgg) | Group10. 9:108282                                                                 | ggctcgttggtctaggggatgatttctcgcttaggggtgcgagaggtcccgggtcaaatacccggacgagcc  |
| -1       | -108211                                                                           | c                                                                         |
| Pro(cgg) | Group16. 19:74354                                                                 | ggctcgttggtctaggggatgattctcgcttaggggtgcgagaggtcccgggtcaaatacccggacgagcc   |
| -2       | 8-743619                                                                          | c                                                                         |
| Pro(cgg) | GroupUn. 9233:306                                                                 | ggctcgttggtctaggggatgattctcgcttaggggtgcgagaggtcccgggtcaaatacccggacgagcc   |
| -3       | -235                                                                              | c                                                                         |
| Pro(cgg) | GroupUn. 9236:708                                                                 | ggctcgttggtctaggggatgattctcgcttaggggtgcgagaggtcccgggtcaaatacccggacgagcc   |
| -4       | 2-7153                                                                            | c                                                                         |
| Pro(tgg) | Group10. 19:33560                                                                 | ggctcagtggtctaggggatgattctcgcttaggggtgcgagaggtcccgggtcaaatacccggctgagcc   |
| 1        | 5-335534                                                                          | c                                                                         |
| Pro(tgg) | Group2.3 6:438407                                                                 | ggctcagtggtctaggggatgattctcgcttaggggtgcgagaggtcccgggtcaaatacccggctgagcc   |
| 2        | -438336                                                                           | c                                                                         |
| Pro(tgg) | Group7.2 8:51137-                                                                 | ggctcagtggtctaggggatgattctcgcttaggggtgcgagaggtcccgggtcaaatacccggctgagcc   |
| 3        | 51208                                                                             | c                                                                         |
| Pro(tgg) | Group7.2 8:51557-                                                                 | ggcctcttggtctaggggatgattcctgcttaggggtgcaggaggtcccgggtcaaatacccggagggggcc  |
| 4        | 51628                                                                             | c                                                                         |
| Ser(aga) | Group15. 28:19831                                                                 | gcagtcgtggccgagtggttaaggcgtctgactagaaatcagattccctctgggagcgtaggttcgagtc    |
| -1       | 4-198395                                                                          | ctaccgactgcg                                                              |
| Ser(aga) | Group4.1 2:309507                                                                 | gcagtcgtggccgagtggttaaggcgtctgactagaaatcagattccctctgggagcgtaggttcgagtc    |
| -2       | -309588                                                                           | ctaccgactgcg                                                              |
| Ser(aga) | Group4.1 7:328828                                                                 | gcagtcgtggccgagtggttaaggcgtctgactagaaatcagattccctctgggagcgtaggttcgagtc    |
| -3       | -328747                                                                           | ctaccgactgcg                                                              |
| Ser(aga) | Group4.9: 215905-                                                                 | gcagtcgtggccgagtggttaaggcgtctgactagaaatcagattccctctgggagcgtaggttcgagtc    |
| -4       | 215824                                                                            | ctaccgactgcg                                                              |
| Ser(aga) | Group8.1 6:83736-                                                                 | gcagtcgtggccgagtggttaaggcgtctgactagaaatcagattccctctgggagcgtaggttcgagtc    |
| -5       | 83655                                                                             | ctaccgactgcg                                                              |
| Ser(cga) | Group1.2: 279388-                                                                 | gcagccgtggccgagtggttaaggcgtctgactcgaatcagattccctctgggagcgtaggttcgaatc     |
| -1       | 279469                                                                            | ctaccgctgcg                                                               |
| Ser(cga) | Group5.6: 116273-                                                                 | gctgtggtgtccgagtggttaaggagtcagactcgaatctgatgggctatgcccgcacaggttcgaatc     |
| -2       | 116354                                                                            | ctgtccgagcg                                                               |
| Ser(cga) | GroupUn. 101:5407                                                                 | gctgcggtgtccgagtggttaaggagttggactcgaatccaatgggttttcccgcataaggttcgaatcct   |
| -3       | 7-53996                                                                           | atccgtagcg                                                                |
| Ser(gct) | Group10. 37:20168                                                                 | tgacgaggtggccgagtggttaaggcgttaggactgctaataccaatgtgctctgcacgcgtgggttcgaatc |
| 1        | 4-201765                                                                          | ccatcctcgtcga                                                             |
| Ser      | Group11. gacgaggtggccgagtggttaaggcgttaggactgctaataccaatgtgctctgcacgcgtgggttcgaatc |                                                                           |

|                    |                                        |                                                                                       |
|--------------------|----------------------------------------|---------------------------------------------------------------------------------------|
| gct)-<br>2         | 3:50135-<br>50216                      | ccatcctcgtcg                                                                          |
| Ser(<br>gct)-<br>3 | Group12.<br>14:27441<br>-27522         | gacgaggtggccgagtggttaaggcgttgactgctaataccaatgtgctctgcacgcgtgggttcgaat<br>ccatcctcgtcg |
| Ser(<br>gct)-<br>4 | Group8.2<br>0:752405<br>-752488        | gacgaggtggccgagtggttaaggcgttgactgctaataccaatgtgctctgcacgcgtgggttcgaat<br>ccatcctcgtcg |
| Ser(t<br>ga)-<br>1 | Group11.<br>31:59545<br>8-595385       | aatctttagcgcacgatcgagcgctacaactcttgaaaaggttatcactcgatccttcgagtcacgatc<br>t            |
| Ser(t<br>ga)-<br>2 | Group12.<br>30:13845<br>96-<br>1384678 | gctgcggtgtccgagcggtaaggagatggactgaaatccattgggtgtaacccgcacaggttcgaat<br>cctgtccgcagcg  |
| Ser(t<br>ga)-<br>3 | GroupUn.<br>130:3284<br>3-32926        | tgctgcggtgtccgagcggtaaggagatggactgaaatccattgggttctaccgcgcaggttcgaatc<br>ctgtccgcagcgg |
| Thr(<br>agt)-<br>1 | Group15.<br>28:19865<br>2-198725       | ggcgccgtggcttagttggttaaagcgcctgtctagtaaacaggagatcgaggggttcgaatccctccggg<br>gcct       |
| Thr(<br>agt)-<br>2 | Group16.<br>19:72892<br>1-728994       | ggcgccgtggcttagttggttaaagcgcctgtctagtaaacaggagatcgaggggttcgaatccctccggg<br>gcct       |
| Thr(<br>agt)-<br>3 | Group16.<br>19:74127<br>2-741197       | ggcgccgtggcttagttggttaaagcgcctgtctagtaaacaggagatcgaggggttcgaatccctccggg<br>gcct       |
| Thr(<br>agt)-<br>4 | Group4.2<br>3:679171<br>-679244        | ggcgccgtggcttagctggtaagcgcctgtctagtaaacaggagatcgaggggttcgaatcccccg<br>ggcct           |
| Thr(<br>agt)-<br>5 | Group6.5<br>5:648436<br>-648509        | aggcgccgtggcttagttggttaaagcgcctgtctagtaaacaggagatcgaggggttcgaatccctccg<br>gagcctt     |
| Thr(<br>cgt)-<br>1 | Group10.<br>28:97838<br>-97909         | gcctcttagctcagtggttagagcactggtctcgtaaaccaggggtcgtgagtcaatcctcacaggaggc<br>a           |
| Thr(<br>cgt)-<br>2 | Group6.1<br>6:30470-<br>30399          | gcctcttagctcagtggcagagcactggtctcgtaaaccaggggtcgtgagtcaaacctcacaggagg<br>ca            |
| Thr(t<br>gt)-1     | Group14.<br>11:22675<br>9-226687       | gcctccatagctcaggggtagagcactggtctgtaaaccaggggtcgagagttcaaatctctctgggg<br>gca           |
| Thr(t<br>gt)-2     | Group3.2<br>7:176965<br>-176893        | gcctccatagctcaggggtagagcactggtctgtaaaccaggggtcgagagttcaaatctctctgggg<br>gca           |
| Thr(t<br>gt)-3     | Group3.2<br>7:182246<br>-182174        | gcctccatagctcaggggtagagcactggtctgtaaaccaggggtcgagagttcaaatctctctggag<br>gca           |
| Trp(<br>cca)<br>-1 | Group15.<br>28:19441<br>7-194488       | gactccgtggcgcaacggtagcgcgtctgactccagatcagaaggttcggtgtcaaatcacgtcggggg<br>ca           |
| Trp(<br>cca)<br>-2 | Group15.<br>28:19779<br>3-197864       | gactccgtggcgcaacggtagcgcgtctgactccagatcagaaggttcggtgtcaaatcacgtcggggg<br>ca           |
| Trp(<br>cca)       | Group3.2<br>5:936255                   | gactccgtggcgcaacggtagcgcgtctgactccagatcagaaggttcggtgtcaaatcacgtcggggg<br>ca           |

|       |           |                                                                           |
|-------|-----------|---------------------------------------------------------------------------|
| -3    | -936184   |                                                                           |
| Trp(  | Group8.4  |                                                                           |
| cca)  | 6:248383  | gactccgtggcgcaacggtagcgcgtctgactccagatcagaaggtgctgttcaaatcacgtcgggggt     |
| -4    | -248454   | ca                                                                        |
|       | Group11.  |                                                                           |
| Tyr.l | 31:19963  |                                                                           |
| .GT   | 84-       | CCTTCGATAGCTCAGTTGGTAGAGCGGTGGACTGTAGttggaagttaaaaat                      |
| A-1   | 1996282   | atacggacATCCATAGGtCGCTGGTTCGAATCCGGCTCGAAGGA                              |
| Tyr.l | Group2.3  |                                                                           |
| .GT   | 3:720608  | CCTTCGATAGCTCAGTTGGTAGAGCGGTGGACTGTAGttggaagttaaaaat                      |
| A-2   | -720512   | atacggacATCCATAGGtCGCTGGTTCGAATCCGGCTCGAAGGA                              |
| Tyr.l | Group2.3  |                                                                           |
| .GT   | 3:726740  | CCTTCGATAGCTCAGTTGGTAGAGCGGTGGACTGTAGttggtccgagtaatcttt                   |
| A-3   | -726644   | aaaagagagacATCCATAGGtCGCTGGTTCGAATCCGGCTCGAAGGA                           |
| Tyr.l | Group3.1  |                                                                           |
| .GT   | 3:47543-  | CCTTCGATAGCTCAGTTGGTAGAGCGGTGGACTGTAGttggcttcttaaaaatt                    |
| A-4   | 47449     | gacagatATCCATAGGtCGCTGGTTCGAATCCGGCTCGAATGA                               |
| Tyr.l | Group5.2  |                                                                           |
| .GT   | 7:210227  | CCTTCGATAGCTCAGTTGGTAGAGCGGTGGACTGTAGttggtgattctggaga                     |
| A-5   | -210318   | cATCCATAGGtCGCTGGTTCGAATCCGGCTCGAAGGA                                     |
| Val(  | Group3.2  |                                                                           |
| aac)  | 5:62723-  | gttccgtgggtagtagggtatcacatccgcctaacacgcggaaggtccccggttcgatccccgggcggaa    |
| -1    | 62651     | aca                                                                       |
| Val(  | Group3.2  |                                                                           |
| aac)  | 5:63218-  | gttccgtgggtagtagggtatcacatccgcctaacacgcggaaggtccccggttcgatccccgggcggaa    |
| -2    | 63146     | aca                                                                       |
| Val(  | Group3.4: |                                                                           |
| aac)  | 119167-   | gttccgtgggtagtagggtatcacatccgcctaacacgcggaaggtccccggttcgatccccgggcggaa    |
| -3    | 119239    | aca                                                                       |
| Val(  | Group3.5: |                                                                           |
| aac)  | 76455-    | gttccgtgggtagtagggtatcacatccgcctaacacgcggaaggtccccggttcgatccccgggcggaa    |
| -4    | 76383     | aca                                                                       |
| Val(  | Group4.1  |                                                                           |
| aac)  | 5:89921-  | gttccgtgggtagtagggtatcacatccgcctaacacgcggaaggtccccagttcgatccccgggcggaa    |
| -5    | 89849     | aca                                                                       |
| Val(  | Group11.  |                                                                           |
| cac)  | 28:93339  | gttccgtagtagtagggtatcacgtgtgcttcacacgcacaaggtccccggttcgatccccgggcggaaa    |
| -1    | -93267    | ca                                                                        |
| Val(  | Group8.3  |                                                                           |
| cac)  | 5:133764  | gttccgtagtagtagggtatcacgtgtgcttcacacgcacaaggtccccggttcgatccccgggcggaaa    |
| -2    | -133836   | ca                                                                        |
| Val(  | Group9.2  |                                                                           |
| cac)  | 1:76362-  | gttccgtagtagtagggtatcacgtgtgcttcacacgcacaaggtccccggttcgatccccgggcggaaa    |
| -3    | 76290     | ca                                                                        |
| Val(t | Group12.  |                                                                           |
| ac)-  | 22:12384  | ggtccgtgggtagtagggtatcacatctgctttacacgcagaagatcaccggttcgattccggtcggaaacc  |
| 1     | 3-123768  | a                                                                         |
| Val(t | Group12.  |                                                                           |
| ac)-  | 30:67324  | ggtccgtgggtagtagggtatcacgtgtgctttacacgcagaaggtcggcgggttcgatccccggtcggaaac |
| 2     | 9-673321  | cacca                                                                     |
| Val(t | Group3.3  |                                                                           |
| ac)-  | 8:389054  | ggtccgtgggtagtagggtatcacgtgtgctttacacgcagaaggtcggcgggttcgatccccggccggaaac |
| 3     | -389126   | ca                                                                        |

Supplementary Table 2a. Clusters of tRNAs in the *Nasonia* genome. Different clusters are shown by alternate colors.

| tRNA        | scaffold     | start   | end     |
|-------------|--------------|---------|---------|
| Arg(cct)-1  | Scaffold1    | 1329943 | 1329870 |
| Arg(cct)-2  | Scaffold1    | 1337257 | 1337184 |
| Lys(ctt)-8  | Scaffold1    | 2938137 | 2938064 |
| Ser(gct)-1  | Scaffold1    | 2939538 | 2939457 |
| Ala(agg)-4  | Scaffold11   | 897447  | 897519  |
| Ala(agg)-1  | Scaffold11   | 898842  | 898914  |
| Ala(agg)-6  | Scaffold11   | 908344  | 908272  |
| Ala(agg)-5  | Scaffold11   | 910664  | 910592  |
| Ala(agg)-7  | Scaffold11   | 911100  | 911172  |
| Ala(agg)-8  | Scaffold11   | 919760  | 919832  |
| Ala(agg)-9  | Scaffold12   | 3037408 | 3037480 |
| Ala(agg)-3  | Scaffold12   | 3038187 | 3038262 |
| Ala(agg)-10 | Scaffold12   | 3045987 | 3046059 |
| Ala(agg)-11 | Scaffold12   | 3046797 | 3046869 |
| Gln(ttg)-2  | Scaffold127  | 320220  | 320291  |
| Gln(ctg)-3  | Scaffold127  | 326382  | 326311  |
| Thr(agt)-3  | Scaffold127  | 331821  | 331894  |
| Phe(gaa)-1  | Scaffold136  | 145649  | 145721  |
| Phe(gaa)-2  | Scaffold136  | 150403  | 150475  |
| Met(cat)-2  | Scaffold139  | 161051  | 160980  |
| Met(cat)-3  | Scaffold139  | 162351  | 162280  |
| Ile(aat)-1  | Scaffold14   | 1817766 | 1817692 |
| Ile(aat)-2  | Scaffold14   | 1817929 | 1817855 |
| Gly(tcc)-1  | Scaffold1516 | 8071    | 7999    |
| Gly(tcc)-6  | Scaffold1516 | 10250   | 10178   |
| Pro(tgg)-3  | Scaffold16   | 2364362 | 2364433 |
| Pro(agg)-3  | Scaffold16   | 2373506 | 2373577 |
| Pro(cgg)-2  | Scaffold16   | 2374331 | 2374259 |
| Pro(tgg)-4  | Scaffold16   | 2375325 | 2375254 |
| Pro(tgg)-5  | Scaffold16   | 2375921 | 2375850 |
| Pro(tgg)-6  | Scaffold16   | 2380219 | 2380290 |
| Pro(cgg)-1  | Scaffold16   | 2915911 | 2915982 |
| His(gtg)-1  | Scaffold16   | 2920720 | 2920649 |
| His(gtg)-2  | Scaffold16   | 2920918 | 2920847 |
| Tyr.I.GTA-4 | Scaffold17   | 648988  | 648894  |
| Tyr.I.GTA-2 | Scaffold17   | 649381  | 649279  |
| Tyr.I.GTA-6 | Scaffold17   | 650468  | 650562  |
| Tyr.I.GTA-3 | Scaffold17   | 653025  | 652930  |
| Tyr.I.GTA-7 | Scaffold17   | 653374  | 653280  |
| Ser(aga)-1  | Scaffold174  | 121495  | 121414  |
| Ser(aga)-2  | Scaffold174  | 124276  | 124357  |
| Phe(gaa)-6  | Scaffold18   | 2018736 | 2018808 |
| Phe(gaa)-7  | Scaffold18   | 2018911 | 2018983 |
| Tyr.I.GTA-9 | Scaffold19   | 1460475 | 1460381 |
| Tyr.I.GTA-8 | Scaffold19   | 1460941 | 1460843 |
| Pro(agg)-6  | Scaffold19   | 2360576 | 2360504 |

|             |            |         |         |
|-------------|------------|---------|---------|
| Thr(agt)-4  | Scaffold19 | 2361065 | 2361138 |
| Lys(ttt)-5  | Scaffold19 | 2702418 | 2702346 |
| Lys(ttt)-2  | Scaffold19 | 2702606 | 2702534 |
| Val(aac)-6  | Scaffold2  | 2586994 | 2586922 |
| Leu(aag)-2  | Scaffold2  | 2591564 | 2591645 |
| Ala(tgc)-1  | Scaffold2  | 2595334 | 2595405 |
| Glu(ttc)-3  | Scaffold2  | 6854218 | 6854147 |
| Leu.I.CAA-3 | Scaffold2  | 6855276 | 6855150 |
| Leu.I.CAA-2 | Scaffold2  | 6856357 | 6856237 |
| Val(cac)-2  | Scaffold20 | 542425  | 542353  |
| Val(cac)-3  | Scaffold20 | 543802  | 543730  |
| Val(aac)-1  | Scaffold20 | 1852080 | 1852154 |
| Val(aac)-3  | Scaffold20 | 1853127 | 1853199 |
| Val(aac)-4  | Scaffold20 | 1854222 | 1854294 |
| Gly(gcc)-1  | Scaffold21 | 2766610 | 2766680 |
| Asp(gtc)-3  | Scaffold21 | 2767278 | 2767349 |
| Trp(cca)-1  | Scaffold24 | 667087  | 667159  |
| Trp(cca)-2  | Scaffold24 | 670150  | 670222  |
| Trp(cca)-3  | Scaffold3  | 42692   | 42763   |
| Asn(gtt)-1  | Scaffold3  | 43229   | 43156   |
| Pro(agg)-2  | Scaffold3  | 1897733 | 1897804 |
| Ala(agc)-12 | Scaffold3  | 1898297 | 1898369 |
| Cys(gca)-5  | Scaffold3  | 1902611 | 1902683 |
| Cys(gca)-2  | Scaffold3  | 1902804 | 1902876 |
| Thr(agt)-1  | Scaffold3  | 1905870 | 1905797 |
| Gly(gcc)-5  | Scaffold36 | 1181244 | 1181314 |
| Gly(gcc)-6  | Scaffold36 | 1181887 | 1181817 |
| Gly(gcc)-2  | Scaffold36 | 1189016 | 1188943 |
| Asp(gtc)-10 | Scaffold36 | 1190204 | 1190133 |
| Glu(ttc)-4  | Scaffold37 | 867980  | 868051  |
| Glu(ttc)-5  | Scaffold37 | 870139  | 870068  |
| Arg(acg)-3  | Scaffold37 | 873878  | 873950  |
| Glu(ttc)-6  | Scaffold37 | 879334  | 879263  |
| Ser(gct)-2  | Scaffold38 | 1705742 | 1705823 |
| Thr(agt)-5  | Scaffold38 | 1706428 | 1706355 |
| Asp(gtc)-2  | Scaffold38 | 1707122 | 1707051 |
| Ile(aat)-5  | Scaffold40 | 467329  | 467255  |
| Ile(aat)-9  | Scaffold40 | 468070  | 468143  |
| Pro(tgg)-1  | Scaffold40 | 926365  | 926294  |
| Pro(tgg)-2  | Scaffold40 | 926922  | 926851  |
| Arg(tcg)-2  | Scaffold5  | 3970535 | 3970612 |
| Tyr.I.GTA-1 | Scaffold5  | 3971916 | 3971824 |
| Val(aac)-7  | Scaffold5  | 4009123 | 4009051 |
| Val(aac)-2  | Scaffold5  | 4009689 | 4009617 |
| Pro(agg)-4  | Scaffold6  | 3402691 | 3402620 |
| Pro(agg)-5  | Scaffold6  | 3402893 | 3402822 |
| Ile.I.TAT-1 | Scaffold62 | 68579   | 68670   |
| Ile.I.TAT-3 | Scaffold62 | 69860   | 69952   |
| Gly(gcc)-8  | Scaffold62 | 858922  | 858992  |
| Asp(gtc)-5  | Scaffold62 | 862933  | 863004  |

|             |            |         |         |
|-------------|------------|---------|---------|
| Asp(gtc)-6  | Scaffold62 | 863186  | 863257  |
| Asp(gtc)-7  | Scaffold62 | 863329  | 863400  |
| Asp(gtc)-8  | Scaffold62 | 872362  | 872433  |
| Lys(ctt)-11 | Scaffold62 | 876189  | 876262  |
| Lys(ctt)-6  | Scaffold62 | 878625  | 878698  |
| Lys(ctt)-3  | Scaffold62 | 879074  | 879147  |
| Gln(ttg)-3  | Scaffold7  | 3395653 | 3395724 |
| Tyr.l.GTA-5 | Scaffold7  | 3403698 | 3403791 |
| Leu(taa)-2  | Scaffold7  | 3802519 | 3802602 |
| Ala(tgc)-2  | Scaffold7  | 3809592 | 3809521 |
| Ala(tgc)-3  | Scaffold7  | 3810039 | 3810110 |
| Gln(ctg)-5  | Scaffold7  | 3811076 | 3811151 |
| Leu(tag)-2  | Scaffold7  | 3812191 | 3812112 |
| Glu(ctc)-7  | Scaffold8  | 3271512 | 3271583 |
| Glu(ttc)-7  | Scaffold8  | 3273877 | 3273948 |
| Glu(ctc)-5  | Scaffold8  | 3274486 | 3274415 |
| Arg(acg)-4  | Scaffold9  | 89213   | 89141   |
| Ile(aat)-6  | Scaffold9  | 95529   | 95455   |
| His(gtg)-5  | Scaffold9  | 338317  | 338388  |
| His(gtg)-6  | Scaffold9  | 338960  | 339031  |
| His(gtg)-7  | Scaffold9  | 342615  | 342686  |
| His(gtg)-8  | Scaffold9  | 343938  | 344009  |
| Met(cat)-7  | Scaffold9  | 345769  | 345843  |

Supplementary Table 2b. Clusters of tRNAs in the honey bee genome. Different clusters are shown by alternate colors.

| tRNA        | linkage_group | start  | end    |
|-------------|---------------|--------|--------|
| Ser(gct)-1  | Group10.37    | 201684 | 201765 |
| Asp(gtc)-1  | Group10.37    | 202350 | 202277 |
| Lys(ctt)-2  | Group10.37    | 203884 | 203956 |
| Asn(gtt)-1  | Group10.37    | 204383 | 204310 |
| Ile(aat)-2  | Group11.38    | 5049   | 5122   |
| Arg(acg)-1  | Group11.38    | 7858   | 7930   |
| Gly(tcc)-1  | Group14.23    | 489378 | 489450 |
| Gly(ccc)-1  | Group14.23    | 492651 | 492581 |
| Met(cat)-3  | Group15.13    | 15532  | 15458  |
| Arg(cct)-2  | Group15.13    | 16134  | 16206  |
| His(gtg)-2  | Group15.13    | 16856  | 16785  |
| Leu(aag)-2  | Group15.28    | 193033 | 193114 |
| Trp(cca)-1  | Group15.28    | 194417 | 194488 |
| Trp(cca)-2  | Group15.28    | 197793 | 197864 |
| Ser(aga)-1  | Group15.28    | 198314 | 198395 |
| Thr(agt)-1  | Group15.28    | 198652 | 198725 |
| Lys(ttt)-3  | Group15.34    | 202681 | 202608 |
| Ala(cgc)-2  | Group15.34    | 204620 | 204691 |
| Thr(agt)-2  | Group16.19    | 728921 | 728994 |
| Cys(gca)-1  | Group16.19    | 732607 | 732536 |
| Thr(agt)-3  | Group16.19    | 741272 | 741197 |
| Ala(agc)-1  | Group16.19    | 741802 | 741730 |
| Pro(agg)-1  | Group16.19    | 742886 | 742815 |
| Pro(cgg)-2  | Group16.19    | 743548 | 743619 |
| Gly(tcc)-2  | Group2.33     | 312541 | 312468 |
| Gly(tcc)-3  | Group2.33     | 312897 | 312824 |
| Gly(tcc)-4  | Group2.33     | 313063 | 312990 |
| Gly(tcc)-5  | Group2.33     | 313229 | 313156 |
| Ala(tgc)-2  | Group2.33     | 338066 | 338139 |
| Leu(tag)-1  | Group2.33     | 345629 | 345708 |
| Gln(ctg)-3  | Group2.33     | 346324 | 346251 |
| Ala(tgc)-3  | Group2.33     | 346764 | 346835 |
| Leu(taa)-2  | Group2.33     | 352854 | 352770 |
| Gln(ttg)-1  | Group2.33     | 718762 | 718833 |
| Gln(ctg)-4  | Group2.33     | 718918 | 718991 |
| Gln(ttg)-2  | Group2.33     | 719546 | 719619 |
| Gln(ttg)-3  | Group2.33     | 719709 | 719782 |
| Gln(ctg)-5  | Group2.33     | 719873 | 719944 |
| Tyr.I.GTA-2 | Group2.33     | 720608 | 720512 |
| Gln(ttg)-4  | Group2.33     | 724582 | 724653 |
| Gln(ttg)-5  | Group2.33     | 724738 | 724809 |
| Gln(ttg)-6  | Group2.33     | 724903 | 724974 |
| Gln(ctg)-6  | Group2.33     | 725060 | 725133 |
| Gln(ttg)-7  | Group2.33     | 725679 | 725752 |



|             |           |         |         |
|-------------|-----------|---------|---------|
| Gln(ttg)-8  | Group2.33 | 725842  | 725915  |
| Gln(ctg)-7  | Group2.33 | 726006  | 726077  |
| Tyr.I.GTA-3 | Group2.33 | 726740  | 726644  |
| Gln(ttg)-9  | Group2.33 | 733442  | 733371  |
| Arg(tcg)-3  | Group3.13 | 46968   | 47042   |
| Tyr.I.GTA-4 | Group3.13 | 47543   | 47449   |
| Val(aac)-1  | Group3.25 | 62723   | 62651   |
| Val(aac)-2  | Group3.25 | 63218   | 63146   |
| Asn(gtt)-3  | Group3.25 | 935588  | 935663  |
| Trp(cca)-3  | Group3.25 | 936255  | 936184  |
| Thr(tgt)-2  | Group3.27 | 176965  | 176893  |
| Thr(tgt)-3  | Group3.27 | 182246  | 182174  |
| Arg(tct)-1  | Group3.38 | 382894  | 382966  |
| Val(tac)-3  | Group3.38 | 389054  | 389126  |
| Glu(ttc)-1  | Group4.12 | 263659  | 263730  |
| Ile(aat)-5  | Group4.12 | 264576  | 264501  |
| Asp(gtc)-3  | Group4.12 | 270915  | 270842  |
| Arg(acg)-2  | Group4.12 | 289393  | 289465  |
| Ile(aat)-6  | Group4.12 | 289961  | 289888  |
| Glu(ttc)-2  | Group4.13 | 1007031 | 1006960 |
| Glu(ttc)-3  | Group4.13 | 1007259 | 1007188 |
| Glu(ctc)-3  | Group4.13 | 1009428 | 1009357 |
| Glu(ctc)-4  | Group4.13 | 1041564 | 1041493 |
| Glu(ttc)-4  | Group4.13 | 1042079 | 1042008 |
| Glu(ttc)-5  | Group4.13 | 1044256 | 1044185 |
| Glu(ttc)-6  | Group4.13 | 1047522 | 1047451 |
| Pro(agg)-3  | Group4.23 | 678509  | 678438  |
| Thr(agt)-4  | Group4.23 | 679171  | 679244  |
| Lys(ttt)-4  | Group4.8  | 85527   | 85453   |
| Lys(ttt)-5  | Group4.8  | 85692   | 85618   |
| Lys(ctt)-4  | Group4.8  | 93619   | 93691   |
| Gly(gcc)-2  | Group4.9  | 275293  | 275363  |
| Gly(gcc)-3  | Group4.9  | 275669  | 275739  |
| Gly(gcc)-4  | Group4.9  | 277549  | 277619  |
| Asn(gtt)-5  | Group6.55 | 647432  | 647505  |
| Thr(agt)-5  | Group6.55 | 648436  | 648509  |
| Pro(tgg)-3  | Group7.28 | 51137   | 51208   |
| Pro(tgg)-4  | Group7.28 | 51557   | 51628   |
| Ala(agc)-5  | Group7.37 | 202242  | 202170  |
| Ala(agc)-6  | Group7.37 | 203068  | 202996  |
| Ala(agc)-7  | Group7.37 | 203376  | 203304  |
| Met(cat)-4  | Group8.20 | 870084  | 870155  |
| Met(cat)-5  | Group8.20 | 870432  | 870361  |
| Met(cat)-6  | Group8.20 | 870860  | 870931  |
| Gly(gcc)-7  | Group8.27 | 21318   | 21248   |
| Gly(gcc)-8  | Group8.27 | 21936   | 21866   |
| Asp(gtc)-5  | Group8.27 | 23288   | 23217   |
| Asp(gtc)-6  | Group8.27 | 24089   | 24018   |

|             |             |       |       |
|-------------|-------------|-------|-------|
| Glu(ctc)-5  | Group9.21   | 75307 | 75236 |
| Leu.I.CAA-2 | Group9.21   | 75914 | 75792 |
| Val(cac)-3  | Group9.21   | 76362 | 76290 |
| Met(cat)-7  | GroupUn.357 | 5089  | 5160  |
| Lys(ctt)-6  | GroupUn.357 | 5521  | 5449  |
| Phe(gaa)-5  | GroupUn.81  | 2865  | 2793  |
| Phe(gaa)-6  | GroupUn.81  | 3185  | 3113  |

Supplementary Table 2c. Selected tRNA gene clusters in the silk worm genome.  
Different clusters are shown by alternate colors.

| Bmor tRNA Scaffold |           | start   | end     |
|--------------------|-----------|---------|---------|
| Tyr                | nscaf1898 | 6657861 | 6657949 |
| Tyr                | nscaf1898 | 6747169 | 6747257 |
| Tyr                | nscaf1898 | 6748377 | 6748465 |
| Tyr                | nscaf1898 | 6750640 | 6750731 |
| Tyr                | nscaf1898 | 6753351 | 6753439 |
| Tyr                | nscaf1898 | 6759467 | 6759555 |
| Asp                | nscaf2210 | 3006094 | 3006165 |
| Asp                | nscaf2210 | 3007925 | 3007997 |
| Asp                | nscaf2210 | 3008835 | 3008907 |
| Asp                | nscaf2210 | 3010143 | 3010215 |
| Asp                | nscaf2210 | 3013055 | 3013127 |
| Asp                | nscaf2210 | 3014215 | 3014287 |
| Asp                | nscaf2210 | 4392827 | 4392898 |
| Asp                | nscaf2210 | 4397857 | 4397928 |
| Asp                | nscaf2210 | 4402487 | 4402558 |
| Asp                | nscaf2210 | 4406195 | 4406266 |
| Gly                | nscaf2853 | 220297  | 220367  |
| Gly                | nscaf2853 | 222380  | 222450  |
| Gly                | nscaf2853 | 223490  | 223560  |
| Gly                | nscaf2853 | 227808  | 227878  |
| Gly                | nscaf2853 | 228377  | 228447  |
| Gly                | nscaf2853 | 234606  | 234676  |
| Gly                | nscaf2853 | 244621  | 244691  |
| Gly                | nscaf2853 | 246199  | 246269  |
| Gly                | nscaf2853 | 261690  | 261760  |
| Gly                | nscaf2853 | 262230  | 262300  |
| Gly                | nscaf2853 | 279533  | 279603  |
| Gly                | nscaf2853 | 283768  | 283838  |
| Gly                | nscaf2853 | 287478  | 287548  |
| Ser                | nscaf2882 | 9723    | 9804    |
| Ser                | nscaf2882 | 10520   | 10601   |
| Ser                | nscaf2882 | 11322   | 11403   |
| Ser                | nscaf2882 | 12619   | 12700   |
| Ser                | nscaf2882 | 15348   | 15429   |
| Met                | nscaf2902 | 5012141 | 5012212 |
| Met                | nscaf2902 | 5012306 | 5012377 |
| Met                | nscaf2902 | 5012471 | 5012542 |
| Met                | nscaf2902 | 5012641 | 5012712 |
| Met                | nscaf2902 | 5016401 | 5016472 |
| Met                | nscaf2902 | 5016566 | 5016637 |
| Met                | nscaf2902 | 5016731 | 5016802 |
| Asn                | nscaf2964 | 2675990 | 2676063 |

|     |               |         |         |
|-----|---------------|---------|---------|
| Asn | nscaf2964     | 2676173 | 2676246 |
| Asn | nscaf2964     | 2676356 | 2676429 |
| Asn | nscaf2964     | 2715549 | 2715622 |
| Asn | nscaf2964     | 2715732 | 2715805 |
| Asn | nscaf2964     | 2715915 | 2715988 |
| Asn | nscaf2964     | 2716103 | 2716176 |
| Asn | nscaf2964     | 2732571 | 2732644 |
| Asn | nscaf2964     | 2732754 | 2732826 |
| Asn | nscaf2964     | 2732936 | 2733009 |
| Asn | nscaf2964     | 2733119 | 2733192 |
| Ala | nscaf3066     | 897797  | 897875  |
| Ala | nscaf3066     | 900476  | 900554  |
| Ala | nscaf3066     | 901865  | 901943  |
| Ala | nscaf3066     | 902808  | 902886  |
| Ala | nscaf3066     | 904522  | 904600  |
| Ala | nscaf3066     | 905284  | 905362  |
| Ala | nscaf3066     | 906009  | 906087  |
| Ala | nscaf3066     | 906739  | 906817  |
| Ala | nscaf3066     | 908416  | 908494  |
| Ala | scaffold11343 | 146     | 218     |
| Ala | scaffold11343 | 297     | 369     |
| Ala | scaffold11343 | 448     | 520     |
| Ala | scaffold11343 | 599     | 671     |
| Ala | scaffold14128 | 96      | 168     |
| Ala | scaffold14128 | 246     | 318     |
| Ala | scaffold14128 | 398     | 470     |
| Ala | scaffold14128 | 549     | 621     |
| Met | scaffold15441 | 154     | 225     |
| Met | scaffold15441 | 319     | 390     |
| Met | scaffold15441 | 484     | 555     |
| Asn | scaffold17259 | 54      | 127     |
| Asn | scaffold17259 | 237     | 310     |
| Asn | scaffold17259 | 420     | 493     |
| Asn | scaffold17259 | 603     | 676     |
| Ala | scaffold23280 | 153     | 225     |
| Ala | scaffold23280 | 304     | 376     |
| Ala | scaffold23280 | 455     | 527     |
| Asp | scaffold864   | 3341    | 3412    |
| Asp | scaffold864   | 4999    | 5070    |
| Asp | scaffold864   | 9953    | 10024   |

Supplementary Table 2d. Selected tRNA gene clusters in the *Drosophila melanogaster* genome. Different clusters are shown by alternate colors.

| Dmel tRNA | Chromosome | start    | end      |
|-----------|------------|----------|----------|
| Arg       | chr2R      | 1668923  | 1668995  |
| Asn       | chr2R      | 1669411  | 1669484  |
| Asn       | chr2R      | 1669585  | 1669658  |
| Asn       | chr2R      | 1669907  | 1669980  |
| Lys       | chr2R      | 1670069  | 1670141  |
| Lys       | chr2R      | 1672264  | 1672336  |
| Lys       | chr2R      | 1673372  | 1673444  |
| Ile       | chr2R      | 1673539  | 1673612  |
| Arg       | chr2R      | 1676995  | 1677067  |
| Lys       | chr2R      | 1678884  | 1678956  |
| Arg       | chr2R      | 1679075  | 1679147  |
| Ile       | chr2R      | 8946189  | 8946262  |
| Leu       | chr2R      | 8946602  | 8946722  |
| Ile       | chr2R      | 8946891  | 8946964  |
| Ile       | chr2R      | 8947192  | 8947265  |
| Ile       | chr2R      | 8947684  | 8947757  |
| Ile       | chr2R      | 8948000  | 8948073  |
| Glu       | chr2R      | 15241005 | 15241076 |
| Glu       | chr2R      | 15242323 | 15242394 |
| Glu       | chr2R      | 15242844 | 15242915 |
| Glu       | chr2R      | 15243051 | 15243122 |
| Glu       | chr2R      | 15243750 | 15243821 |
| Glu       | chr3L      | 1363466  | 1363537  |
| Glu       | chr3L      | 1363770  | 1363841  |
| Glu       | chr3L      | 1364061  | 1364132  |
| Glu       | chr3L      | 1381227  | 1381298  |
| Glu       | chr3L      | 1381464  | 1381535  |
| Glu       | chr3L      | 1381701  | 1381772  |
| Glu       | chr3L      | 1381938  | 1382009  |
| Glu       | chr3L      | 1384972  | 1385043  |
| Glu       | chr3L      | 1385313  | 1385384  |
| Cys       | chr3L      | 3079269  | 3079340  |
| Cys       | chr3L      | 3079523  | 3079594  |
| Cys       | chr3L      | 3079901  | 3079972  |
| Leu       | chr3L      | 8034161  | 8034243  |
| Leu       | chr3L      | 8034398  | 8034480  |
| Leu       | chr3L      | 8034621  | 8034703  |
| Leu       | chr3L      | 8039590  | 8039672  |
| Leu       | chr3L      | 8039941  | 8040023  |
| Asn       | chr3R      | 3965255  | 3965328  |
| Arg       | chr3R      | 3965673  | 3965745  |
| Arg       | chr3R      | 3965945  | 3966017  |

|     |       |          |          |
|-----|-------|----------|----------|
| Arg | chr3R | 3966198  | 3966270  |
| Arg | chr3R | 3966449  | 3966521  |
| Val | chr3R | 13443483 | 13443555 |
| Pro | chr3R | 13443832 | 13443903 |
| Ala | chr3R | 13445460 | 13445532 |
| Pro | chr3R | 13445683 | 13445754 |
| Ala | chr3R | 13445866 | 13445938 |
| Ala | chr3R | 13448268 | 13448340 |
| Thr | chr3R | 13450287 | 13450360 |
| Thr | chr3R | 13450528 | 13450601 |
| Val | chr3R | 13454808 | 13454880 |
| Ala | chr3R | 13456764 | 13456836 |
| Pro | chr3R | 13457401 | 13457472 |
| Ala | chr3R | 13471029 | 13471101 |
| Pro | chr3R | 13471332 | 13471403 |
| Ala | chr3R | 13472090 | 13472162 |
| Ala | chr3R | 13472405 | 13472477 |
| Ala | chr3R | 13482867 | 13482939 |
| Ala | chr3R | 13484103 | 13484175 |
| Ser | chr3R | 18222250 | 18222331 |
| Ser | chr3R | 18222521 | 18222602 |
| Ser | chr3R | 18222902 | 18222983 |
| Arg | chrX  | 13848751 | 13848823 |
| Ser | chrX  | 13848982 | 13849063 |
| Ser | chrX  | 13849382 | 13849463 |
| Arg | chrX  | 13850140 | 13850212 |
| Arg | chrX  | 13850745 | 13850817 |
| Arg | chrX  | 13850947 | 13851019 |
